# Supplementary material for: Proteomic Analysis of Fusarium solani Isolated from the Asian Longhorned Beetle, Anoplophora glabripennis
Source: PLoS One. 2012 Apr 9;7(4):e32990. doi: 10.1371/journal.pone.0032990 (PMC3322136; doi:10.1371/journal.pone.0032990)
Supplement: Table S3 — KEGG annotations of proteins identified in MudPIT analysis. (XLS) [file pone.0032990.s003.xls]

## Sheet: Table S3
Table S3: InterPro Protein Domain Predictions
Protein Number	Necha 2.0 Accession Number	IPR ID	IPR Description	Domand Database	Domain ID
1	98804	IPR000254	Cellulose-binding region, fungal	BlastProDom	PD001821
1	98804	IPR000254	Cellulose-binding region, fungal	HMMPfam	PF00734
1	98804	IPR000254	Cellulose-binding region, fungal	HMMSmart	SM00236
1	98804	IPR000254	Cellulose-binding region, fungal	ScanRegExp	PS00562
1	98804	IPR001722	Glycoside hydrolase, family 7	BlastProDom	PD186135
1	98804	IPR001722	Glycoside hydrolase, family 7	FPrintScan	PR00734
1	98804	IPR001722	Glycoside hydrolase, family 7	HMMPfam	PF00840
2	39290	IPR001764	Glycoside hydrolase, family 3, N-terminal	FPrintScan	PR00133
2	39290	IPR001764	Glycoside hydrolase, family 3, N-terminal	HMMPfam	PF00933
2	39290	IPR001764	Glycoside hydrolase, family 3, N-terminal	ScanRegExp	PS00775
2	39290	IPR002772	Glycoside hydrolase, family 3, C-terminal	HMMPfam	PF01915
4	70633	IPR000322	Glycoside hydrolase, family 31	HMMPfam	PF01055
5	106067
6	92513	IPR000165	Glycoside hydrolase, family 15	FPrintScan	PR00736
6	92513	IPR000165	Glycoside hydrolase, family 15	HMMPfam	PF00723
6	92513	IPR000165	Glycoside hydrolase, family 15	ScanRegExp	PS00820
6	92513	IPR002044	Glycoside hydrolase, starch-binding	BlastProDom	PD001568
6	92513	IPR002044	Glycoside hydrolase, starch-binding	HMMPfam	PF00686
9	95359	IPR007934	Alpha-L-arabinofuranosidase B	HMMPfam	PF05270
10	63845	IPR001563	Peptidase S10, serine carboxypeptidase	BlastProDom	PD001189
10	63845	IPR001563	Peptidase S10, serine carboxypeptidase	FPrintScan	PR00724
10	63845	IPR001563	Peptidase S10, serine carboxypeptidase	HMMPfam	PF00450
10	63845	IPR001563	Peptidase S10, serine carboxypeptidase	ScanRegExp	PS00131
10	63845	IPR002328	Zinc-containing alcohol dehydrogenase	ScanRegExp	PS00059
11	89921	IPR001540	Glycoside hydrolase, family 20	FPrintScan	PR00738
11	89921	IPR001540	Glycoside hydrolase, family 20	HMMPfam	PF00728
11	89921	IPR001540	Glycoside hydrolase, family 20	HMMPfam	PF02838
12	72498	IPR004886	Glycolipid anchored surface protein GAS1	HMMPfam	PF03198
13	66929	IPR000379	Esterase/lipase/thioesterase	ProfileScan	PS50187
13	66929	IPR008758	Peptidase S28	HMMPfam	PF05577
14	101753	IPR001461	Peptidase A1, pepsin	FPrintScan	PR00792
14	101753	IPR001461	Peptidase A1, pepsin	HMMPfam	PF00026
14	101753	IPR001969	Peptidase aspartic, active site	ScanRegExp	PS00141
15	89124	IPR006045	Cupin	HMMPfam	PF00190
15	89124	IPR007113	Cupin region	ProfileScan	PS50849
16	28207	IPR000757	Glycoside hydrolase, family 16	HMMPfam	PF00722
17	86938	IPR000209	Peptidase S8 and S53, subtilisin, kexin, sedolisin	FPrintScan	PR00723
17	86938	IPR000209	Peptidase S8 and S53, subtilisin, kexin, sedolisin	HMMPfam	PF00082
17	86938	IPR000209	Peptidase S8 and S53, subtilisin, kexin, sedolisin	ScanRegExp	PS00136
17	86938	IPR000209	Peptidase S8 and S53, subtilisin, kexin, sedolisin	ScanRegExp	PS00137
17	86938	IPR000209	Peptidase S8 and S53, subtilisin, kexin, sedolisin	ScanRegExp	PS00138
17	86938	IPR010259	Proteinase inhibitor I9, subtilisin propeptide	HMMPfam	PF05922
18	70723	IPR004843	Metallophosphoesterase	HMMPfam	PF00149
18	70723	IPR004843	Metallophosphoesterase	ProfileScan	PS50185
19	92290	IPR000782	Beta-Ig-H3/fasciclin	HMMPfam	PF02469
19	92290	IPR000782	Beta-Ig-H3/fasciclin	HMMSmart	SM00554
19	92290	IPR000782	Beta-Ig-H3/fasciclin	ProfileScan	PS50213
20	73991	IPR000254	Cellulose-binding region, fungal	BlastProDom	PD001821
20	73991	IPR000254	Cellulose-binding region, fungal	HMMPfam	PF00734
20	73991	IPR000254	Cellulose-binding region, fungal	HMMSmart	SM00236
20	73991	IPR000254	Cellulose-binding region, fungal	ScanRegExp	PS00562
20	73991	IPR001524	Glycoside hydrolase, family 6	BlastProDom	PD003733
20	73991	IPR001524	Glycoside hydrolase, family 6	FPrintScan	PR00733
20	73991	IPR001524	Glycoside hydrolase, family 6	HMMPfam	PF01341
20	73991	IPR001524	Glycoside hydrolase, family 6	ScanRegExp	PS00655
20	73991	IPR001524	Glycoside hydrolase, family 6	ScanRegExp	PS00656
21	86582	IPR001000	Glycoside hydrolase, family 10	FPrintScan	PR00134
21	86582	IPR001000	Glycoside hydrolase, family 10	HMMPfam	PF00331
21	86582	IPR001000	Glycoside hydrolase, family 10	HMMSmart	SM00633
22	97055	IPR008183	Aldose 1-epimerase	HMMPfam	PF01263
23	55960	IPR002860	Glycosyl hydrolase, BNR repeat	HMMPfam	PF02012
24	69103	IPR001461	Peptidase A1, pepsin	FPrintScan	PR00792
24	69103	IPR001461	Peptidase A1, pepsin	HMMPfam	PF00026
24	69103	IPR001969	Peptidase aspartic, active site	ScanRegExp	PS00141
25	70989	IPR001661	Glycoside hydrolase, family 37	FPrintScan	PR00744
25	70989	IPR001661	Glycoside hydrolase, family 37	HMMPfam	PF01204
26	97581	IPR000254	Cellulose-binding region, fungal	BlastProDom	PD001821
26	97581	IPR000254	Cellulose-binding region, fungal	HMMPfam	PF00734
26	97581	IPR000254	Cellulose-binding region, fungal	HMMSmart	SM00236
26	97581	IPR000254	Cellulose-binding region, fungal	ScanRegExp	PS00562
26	97581	IPR001547	Glycoside hydrolase, family 5	HMMPfam	PF00150
27	98508	IPR001360	Glycoside hydrolase, family 1	FPrintScan	PR00131
27	98508	IPR001360	Glycoside hydrolase, family 1	HMMPfam	PF00232
28	123372	IPR010829	Cerato-platanin	HMMPfam	PF07249
29	104624	IPR000120	Amidase	HMMPfam	PF01425
30	30050	IPR000379	Esterase/lipase/thioesterase	ProfileScan	PS50187
30	30050	IPR000408	Regulator of chromosome condensation, RCC1	ScanRegExp	PS00626
30	30050	IPR002018	Carboxylesterase, type B	HMMPfam	PF00135
30	30050	IPR002018	Carboxylesterase, type B	ScanRegExp	PS00122
31	64790	IPR001563	Peptidase S10, serine carboxypeptidase	BlastProDom	PD001189
31	64790	IPR001563	Peptidase S10, serine carboxypeptidase	FPrintScan	PR00724
31	64790	IPR001563	Peptidase S10, serine carboxypeptidase	HMMPfam	PF00450
31	64790	IPR001563	Peptidase S10, serine carboxypeptidase	ScanRegExp	PS00131
32	95979	IPR000103	Pyridine nucleotide-disulphide oxidoreductase, class-II	FPrintScan	PR00469
32	95979	IPR001100	Pyridine nucleotide-disulphide oxidoreductase, class I	FPrintScan	PR00411
32	95979	IPR001327	FAD-dependent pyridine nucleotide-disulphide oxidoreductase	FPrintScan	PR00368
33	52718	IPR001117	Multicopper oxidase, type 1	HMMPfam	PF00394
33	52718	IPR001117	Multicopper oxidase, type 1	ScanRegExp	PS00079
33	52718	IPR002355	Multicopper oxidase, copper-binding site	ScanRegExp	PS00080
34	45063
35	53608	IPR002860	Glycosyl hydrolase, BNR repeat	HMMPfam	PF02012
36	59218	IPR001585	Transaldolase	HMMPfam	PF00923
36	59218	IPR001585	Transaldolase	ScanRegExp	PS00958
36	59218	IPR001585	Transaldolase	ScanRegExp	PS01054
36	59218	IPR004730	Transaldolase AB	HMMTigr	TIGR00874
37	66755	IPR002227	Tyrosinase	FPrintScan	PR00092
37	66755	IPR002227	Tyrosinase	HMMPfam	PF00264
37	66755	IPR002227	Tyrosinase	ScanRegExp	PS00497
37	66755	IPR002227	Tyrosinase	ScanRegExp	PS00498
38	69590	IPR010829	Cerato-platanin	HMMPfam	PF07249
39	24316	IPR004153	CXCXC repeat	HMMPfam	PF03128
40	92861	IPR002226	Catalase	BlastProDom	PD000510
40	92861	IPR002226	Catalase	FPrintScan	PR00067
40	92861	IPR002226	Catalase	HMMPfam	PF00199
40	92861	IPR002226	Catalase	ScanRegExp	PS00437
40	92861	IPR002226	Catalase	ScanRegExp	PS00438
40	92861	IPR010582	Catalase-related	HMMPfam	PF06628
41	102898
42	45430
43	61473	IPR000209	Peptidase S8 and S53, subtilisin, kexin, sedolisin	FPrintScan	PR00723
43	61473	IPR000209	Peptidase S8 and S53, subtilisin, kexin, sedolisin	HMMPfam	PF00082
43	61473	IPR000209	Peptidase S8 and S53, subtilisin, kexin, sedolisin	ScanRegExp	PS00137
43	61473	IPR000209	Peptidase S8 and S53, subtilisin, kexin, sedolisin	ScanRegExp	PS00138
43	61473	IPR010259	Proteinase inhibitor I9, subtilisin propeptide	HMMPfam	PF05922
44	5675
45	94437	IPR001680	G-protein beta WD-40 repeat	ScanRegExp	PS00678
46	40795	IPR001254	Peptidase S1, chymotrypsin	HMMPfam	PF00089
46	40795	IPR001254	Peptidase S1, chymotrypsin	HMMSmart	SM00020
46	40795	IPR001254	Peptidase S1, chymotrypsin	ProfileScan	PS50240
46	40795	IPR001254	Peptidase S1, chymotrypsin	ScanRegExp	PS00134
46	40795	IPR001254	Peptidase S1, chymotrypsin	ScanRegExp	PS00135
46	40795	IPR001314	Peptidase S1A, chymotrypsin	FPrintScan	PR00722
46	40795	IPR008256	Peptidase S1B, glutamyl endopeptidase I	FPrintScan	PR00839
47	59203	IPR001424	Copper/Zinc superoxide dismutase	BlastProDom	PD000469
47	59203	IPR001424	Copper/Zinc superoxide dismutase	FPrintScan	PR00068
47	59203	IPR001424	Copper/Zinc superoxide dismutase	HMMPfam	PF00080
47	59203	IPR001424	Copper/Zinc superoxide dismutase	ScanRegExp	PS00087
47	59203	IPR001424	Copper/Zinc superoxide dismutase	ScanRegExp	PS00332
48	87185	IPR000026	Guanine-specific ribonuclease N1 and T1	HMMPfam	PF00545
49	75440	IPR000209	Peptidase S8 and S53, subtilisin, kexin, sedolisin	FPrintScan	PR00723
49	75440	IPR000209	Peptidase S8 and S53, subtilisin, kexin, sedolisin	HMMPfam	PF00082
49	75440	IPR000209	Peptidase S8 and S53, subtilisin, kexin, sedolisin	ScanRegExp	PS00136
49	75440	IPR000209	Peptidase S8 and S53, subtilisin, kexin, sedolisin	ScanRegExp	PS00137
49	75440	IPR000209	Peptidase S8 and S53, subtilisin, kexin, sedolisin	ScanRegExp	PS00138
49	75440	IPR010259	Proteinase inhibitor I9, subtilisin propeptide	HMMPfam	PF05922
50	81573	IPR002196	Glycoside hydrolase, family 24	HMMPfam	PF00959
51	105868	IPR000254	Cellulose-binding region, fungal	BlastProDom	PD001821
51	105868	IPR000254	Cellulose-binding region, fungal	HMMPfam	PF00734
51	105868	IPR000254	Cellulose-binding region, fungal	HMMSmart	SM00236
51	105868	IPR000254	Cellulose-binding region, fungal	ScanRegExp	PS00562
51	105868	IPR001547	Glycoside hydrolase, family 5	HMMPfam	PF00150
52	94623	IPR000254	Cellulose-binding region, fungal	HMMPfam	PF00734
52	94623	IPR000254	Cellulose-binding region, fungal	HMMSmart	SM00236
52	94623	IPR000254	Cellulose-binding region, fungal	ScanRegExp	PS00562
52	94623	IPR000334	Glycoside hydrolase, family 45	HMMPfam	PF02015
52	94623	IPR000334	Glycoside hydrolase, family 45	ScanRegExp	PS01140
53	42608	IPR001722	Glycoside hydrolase, family 7	BlastProDom	PD186135
53	42608	IPR001722	Glycoside hydrolase, family 7	FPrintScan	PR00734
53	42608	IPR001722	Glycoside hydrolase, family 7	HMMPfam	PF00840
54	101134
55	87892	IPR001842	Peptidase M36, fungalysin	FPrintScan	PR00999
55	87892	IPR001842	Peptidase M36, fungalysin	HMMPfam	PF02128
55	87892	IPR006025	Peptidase M, neutral zinc metallopeptidases, zinc-binding site	ScanRegExp	PS00142
55	87892	IPR011096	Propeptide, peptidase M4 and M36	HMMPfam	PF07504
56	85035	IPR001764	Glycoside hydrolase, family 3, N-terminal	FPrintScan	PR00133
56	85035	IPR001764	Glycoside hydrolase, family 3, N-terminal	HMMPfam	PF00933
56	85035	IPR002772	Glycoside hydrolase, family 3, C-terminal	HMMPfam	PF01915
57	91612	IPR001764	Glycoside hydrolase, family 3, N-terminal	FPrintScan	PR00133
57	91612	IPR001764	Glycoside hydrolase, family 3, N-terminal	HMMPfam	PF00933
57	91612	IPR002772	Glycoside hydrolase, family 3, C-terminal	HMMPfam	PF01915
58	77768	IPR001764	Glycoside hydrolase, family 3, N-terminal	FPrintScan	PR00133
58	77768	IPR001764	Glycoside hydrolase, family 3, N-terminal	HMMPfam	PF00933
58	77768	IPR002772	Glycoside hydrolase, family 3, C-terminal	HMMPfam	PF01915
59	122357
60	43451	IPR000379	Esterase/lipase/thioesterase	ProfileScan	PS50187
60	43451	IPR001563	Peptidase S10, serine carboxypeptidase	BlastProDom	PD001189
60	43451	IPR001563	Peptidase S10, serine carboxypeptidase	FPrintScan	PR00724
60	43451	IPR001563	Peptidase S10, serine carboxypeptidase	HMMPfam	PF00450
61	101640
62	64352	IPR000834	Peptidase M14, carboxypeptidase A	FPrintScan	PR00765
62	64352	IPR000834	Peptidase M14, carboxypeptidase A	HMMPfam	PF00246
62	64352	IPR000834	Peptidase M14, carboxypeptidase A	HMMSmart	SM00631
62	64352	IPR000834	Peptidase M14, carboxypeptidase A	ScanRegExp	PS00132
63	97552	IPR007484	Peptidase M28	HMMPfam	PF04389
64	45775	IPR000834	Peptidase M14, carboxypeptidase A	FPrintScan	PR00765
64	45775	IPR000834	Peptidase M14, carboxypeptidase A	HMMPfam	PF00246
64	45775	IPR000834	Peptidase M14, carboxypeptidase A	HMMSmart	SM00631
64	45775	IPR000834	Peptidase M14, carboxypeptidase A	ScanRegExp	PS00133
64	45775	IPR001412	Aminoacyl-tRNA synthetase, class I	ScanRegExp	PS00178
65	45551	IPR001568	Ribonuclease T2	HMMPfam	PF00445
65	45551	IPR001568	Ribonuclease T2	ScanRegExp	PS00530
65	45551	IPR001568	Ribonuclease T2	ScanRegExp	PS00531
66	61439	IPR002642	Lysophospholipase, catalytic region	HMMPfam	PF01735
66	61439	IPR002642	Lysophospholipase, catalytic region	HMMSmart	SM00022
68	31557	IPR000560	Histidine acid phosphatase	HMMPfam	PF00328
68	31557	IPR000560	Histidine acid phosphatase	ScanRegExp	PS00616
68	31557	IPR000560	Histidine acid phosphatase	ScanRegExp	PS00778
69	66557	IPR003172	E1 protein and Def2/Der2 allergen	HMMPfam	PF02221
69	66557	IPR003172	E1 protein and Def2/Der2 allergen	HMMSmart	SM00737
70	98938	IPR001849	Pleckstrin-like	ProfileScan	PS50003
71	66818
72	64597	IPR007312	Phosphoesterase	HMMPfam	PF04185
73	81019	IPR000675	Cutinase	HMMPfam	PF01083
73	81019	IPR011150	Cutinase, monofunctional	FPrintScan	PR00129
73	81019	IPR011150	Cutinase, monofunctional	HMMPIR	PIRSF000861
73	81019	IPR011150	Cutinase, monofunctional	ScanRegExp	PS00155
73	81019	IPR011150	Cutinase, monofunctional	ScanRegExp	PS00931
74	58149	IPR000582	Acyl-coA-binding protein, ACBP	BlastProDom	PD351532
74	58149	IPR000582	Acyl-coA-binding protein, ACBP	FPrintScan	PR00689
74	58149	IPR000582	Acyl-coA-binding protein, ACBP	HMMPfam	PF00887
75	51674	IPR006046	Glycoside hydrolase family 13	FPrintScan	PR00110
75	51674	IPR006047	Alpha amylase, catalytic region	HMMPfam	PF00128
75	51674	IPR006589	Alpha amylase, catalytic subdomain	HMMSmart	SM00642
76	91822
77	90554	IPR000379	Esterase/lipase/thioesterase	ProfileScan	PS50187
77	90554	IPR002018	Carboxylesterase, type B	HMMPfam	PF00135
77	90554	IPR002018	Carboxylesterase, type B	ScanRegExp	PS00122
78	73723
79	93118	IPR010720	Alpha-L-arabinofuranosidase, C-terminal	HMMPfam	PF06964
80	106471
81	63567	IPR004000	Actin/actin-like	FPrintScan	PR00190
81	63567	IPR004000	Actin/actin-like	HMMPfam	PF00022
81	63567	IPR004000	Actin/actin-like	HMMSmart	SM00268
81	63567	IPR004000	Actin/actin-like	ScanRegExp	PS01132
81	63567	IPR004001	Actin	ScanRegExp	PS00406
81	63567	IPR004001	Actin	ScanRegExp	PS00432
82	56813	IPR000209	Peptidase S8 and S53, subtilisin, kexin, sedolisin	ScanRegExp	PS00138
83	93056	IPR003137	Protease-associated PA	HMMPfam	PF02225
83	93056	IPR003137	Protease-associated PA	ProfileScan	PS50840
83	93056	IPR007484	Peptidase M28	HMMPfam	PF04389
84	42039	IPR000868	Isochorismatase hydrolase	HMMPfam	PF00857
85	82473	IPR000172	Glucose-methanol-choline oxidoreductase	HMMPfam	PF00732
85	82473	IPR000172	Glucose-methanol-choline oxidoreductase	ScanRegExp	PS00623
85	82473	IPR000172	Glucose-methanol-choline oxidoreductase	ScanRegExp	PS00624
85	82473	IPR007867	GMC oxidoreductase	HMMPfam	PF05199
86	61287
87	66036	IPR000757	Glycoside hydrolase, family 16	HMMPfam	PF00722
88	83495	IPR003137	Protease-associated PA	HMMPfam	PF02225
88	83495	IPR003137	Protease-associated PA	ProfileScan	PS50840
88	83495	IPR007484	Peptidase M28	HMMPfam	PF04389
88	83495	NULL	NULL	ScanRegExp	PS00038
89	106063
90	30822	IPR003137	Protease-associated PA	HMMPfam	PF02225
90	30822	IPR003137	Protease-associated PA	ProfileScan	PS50840
90	30822	IPR007365	Transferrin receptor-like dimerisation region	HMMPfam	PF04253
90	30822	IPR007484	Peptidase M28	HMMPfam	PF04389
91	101071
92	75162
93	105345
94	63211
95	51328	IPR001764	Glycoside hydrolase, family 3, N-terminal	FPrintScan	PR00133
95	51328	IPR001764	Glycoside hydrolase, family 3, N-terminal	HMMPfam	PF00933
95	51328	IPR002772	Glycoside hydrolase, family 3, C-terminal	HMMPfam	PF01915
96	52498	IPR000254	Cellulose-binding region, fungal	BlastProDom	PD001821
96	52498	IPR000254	Cellulose-binding region, fungal	HMMPfam	PF00734
96	52498	IPR000254	Cellulose-binding region, fungal	HMMSmart	SM00236
96	52498	IPR000254	Cellulose-binding region, fungal	ScanRegExp	PS00562
96	52498	IPR001722	Glycoside hydrolase, family 7	BlastProDom	PD186135
96	52498	IPR001722	Glycoside hydrolase, family 7	FPrintScan	PR00734
96	52498	IPR001722	Glycoside hydrolase, family 7	HMMPfam	PF00840
97	71712	IPR001952	Alkaline phosphatase	FPrintScan	PR00113
97	71712	IPR001952	Alkaline phosphatase	HMMPfam	PF00245
97	71712	IPR001952	Alkaline phosphatase	HMMSmart	SM00098
98	77788	IPR001362	Glycoside hydrolase, family 32	HMMPfam	PF00251
98	77788	IPR001362	Glycoside hydrolase, family 32	HMMSmart	SM00640
99	94265	IPR009939	Fungal chitosanase	HMMPfam	PF07335
100	96628	IPR000101	Gamma-glutamyltranspeptidase	FPrintScan	PR01210
100	96628	IPR000101	Gamma-glutamyltranspeptidase	HMMPfam	PF01019
100	96628	IPR000101	Gamma-glutamyltranspeptidase	HMMTigr	TIGR00066
101	98600	IPR000695	H+ transporting ATPase, proton pump	FPrintScan	PR00120
101	98600	IPR001757	ATPase, E1-E2 type	FPrintScan	PR00119
101	98600	IPR001757	ATPase, E1-E2 type	ScanRegExp	PS00154
101	98600	IPR004014	Cation transporting ATPase, N-terminal	HMMPfam	PF00690
101	98600	IPR005834	Haloacid dehalogenase-like hydrolase	HMMPfam	PF00702
101	98600	IPR006534	Plasma-membrane proton-efflux P-type ATPase	HMMTigr	TIGR01647
101	98600	IPR008250	E1-E2 ATPase-associated region	HMMPfam	PF00122
102	81095	IPR001461	Peptidase A1, pepsin	FPrintScan	PR00792
102	81095	IPR001461	Peptidase A1, pepsin	HMMPfam	PF00026
102	81095	IPR001969	Peptidase aspartic, active site	ScanRegExp	PS00141
103	90966	IPR000276	Rhodopsin-like GPCR superfamily	ScanRegExp	PS00237
103	90966	IPR001929	Germin	ScanRegExp	PS00725
103	90966	IPR006045	Cupin	HMMPfam	PF00190
104	19302	IPR000250	Peptidase A4, scytalidopepsin B	BlastProDom	PD018627
104	19302	IPR000250	Peptidase A4, scytalidopepsin B	FPrintScan	PR00977
104	19302	IPR000250	Peptidase A4, scytalidopepsin B	HMMPfam	PF01828
105	97545	IPR008701	Necrosis inducing	HMMPfam	PF05630
106	74826	IPR006162	Phosphopantetheine attachment site	ScanRegExp	PS00012
107	103025	IPR008254	Flavodoxin/nitric oxide synthase	HMMPfam	PF00258
107	103025	IPR008254	Flavodoxin/nitric oxide synthase	ProfileScan	PS50902
108	96610	IPR000379	Esterase/lipase/thioesterase	ProfileScan	PS50187
108	96610	IPR008262	Lipase, active site	ScanRegExp	PS00120
109	122999
110	45731
111	61302	IPR004886	Glycolipid anchored surface protein GAS1	HMMPfam	PF03198
112	90684	IPR006045	Cupin	HMMPfam	PF00190
112	90684	IPR007113	Cupin region	ProfileScan	PS50849
113	3212	IPR001002	Chitin-binding, type 1	BlastProDom	PD000609
113	3212	IPR001002	Chitin-binding, type 1	HMMPfam	PF00187
113	3212	IPR001002	Chitin-binding, type 1	HMMSmart	SM00270
113	3212	IPR001002	Chitin-binding, type 1	ScanRegExp	PS00026
113	3212	IPR001223	Glycoside hydrolase, family 18	HMMPfam	PF00704
113	3212	IPR011583	Chitinase II	BlastProDom	PD000471
113	3212	IPR011583	Chitinase II	HMMSmart	SM00636
114	60561	IPR002226	Catalase	BlastProDom	PD000510
114	60561	IPR002226	Catalase	FPrintScan	PR00067
114	60561	IPR002226	Catalase	HMMPfam	PF00199
114	60561	IPR002226	Catalase	ScanRegExp	PS00437
114	60561	IPR002226	Catalase	ScanRegExp	PS00438
114	60561	IPR002818	ThiJ/PfpI	HMMPfam	PF01965
114	60561	IPR010582	Catalase-related	HMMPfam	PF06628
115	98804	IPR000254	Cellulose-binding region, fungal	BlastProDom	PD001821
115	98804	IPR000254	Cellulose-binding region, fungal	HMMPfam	PF00734
115	98804	IPR000254	Cellulose-binding region, fungal	HMMSmart	SM00236
115	98804	IPR000254	Cellulose-binding region, fungal	ScanRegExp	PS00562
115	98804	IPR001722	Glycoside hydrolase, family 7	BlastProDom	PD186135
115	98804	IPR001722	Glycoside hydrolase, family 7	FPrintScan	PR00734
115	98804	IPR001722	Glycoside hydrolase, family 7	HMMPfam	PF00840
116	97410	IPR004898	Pectate lyase	HMMPfam	PF03211
117	93193	IPR000379	Esterase/lipase/thioesterase	ProfileScan	PS50187
117	93193	IPR001375	Peptidase S9, prolyl oligopeptidase active site region	HMMPfam	PF00326
117	93193	IPR002088	Protein prenyltransferase, alpha subunit	ScanRegExp	PS00904
117	93193	IPR002469	Peptidase S9B, dipeptidylpeptidase IV N-terminal	HMMPfam	PF00930
118	60585	IPR003137	Protease-associated PA	HMMPfam	PF02225
118	60585	IPR003137	Protease-associated PA	ProfileScan	PS50840
118	60585	IPR007484	Peptidase M28	HMMPfam	PF04389
119	87546
120	83307	IPR002044	Glycoside hydrolase, starch-binding	BlastProDom	PD001568
120	83307	IPR002044	Glycoside hydrolase, starch-binding	HMMPfam	PF00686
121	66588
122	95104
123	50101	IPR001117	Multicopper oxidase, type 1	HMMPfam	PF00394
123	50101	IPR001117	Multicopper oxidase, type 1	ScanRegExp	PS00079
123	50101	IPR002355	Multicopper oxidase, copper-binding site	ScanRegExp	PS00080
124	101489	IPR000172	Glucose-methanol-choline oxidoreductase	HMMPfam	PF00732
124	101489	IPR000172	Glucose-methanol-choline oxidoreductase	ScanRegExp	PS00624
124	101489	IPR007867	GMC oxidoreductase	HMMPfam	PF05199
125	98794
126	59065	IPR000626	Ubiquitin	FPrintScan	PR00348
126	59065	IPR000626	Ubiquitin	HMMPfam	PF00240
126	59065	IPR000626	Ubiquitin	HMMSmart	SM00213
126	59065	IPR000626	Ubiquitin	ProfileScan	PS50053
126	59065	IPR000626	Ubiquitin	ScanRegExp	PS00299
126	68927	IPR000626	Ubiquitin	FPrintScan	PR00348
126	68927	IPR000626	Ubiquitin	HMMPfam	PF00240
126	68927	IPR000626	Ubiquitin	HMMSmart	SM00213
126	68927	IPR000626	Ubiquitin	ProfileScan	PS50053
126	68927	IPR000626	Ubiquitin	ScanRegExp	PS00299
126	68927	IPR002906	Ribosomal protein S27a	HMMPfam	PF01599
126	9901
127	58598	IPR000152	Aspartic acid and asparagine hydroxylation site	ScanRegExp	PS00010
127	58598	IPR000731	Sterol-sensing 5TM box	ProfileScan	PS50156
127	58598	IPR003392	Patched	HMMPfam	PF02460
128	104927
129	49364	IPR002921	Lipase, class 3	HMMPfam	PF01764
130	36093	IPR000379	Esterase/lipase/thioesterase	ProfileScan	PS50187
130	36093	IPR001680	G-protein beta WD-40 repeat	HMMPfam	PF00400
130	36093	IPR001680	G-protein beta WD-40 repeat	HMMSmart	SM00320
130	36093	IPR001680	G-protein beta WD-40 repeat	ScanRegExp	PS00678
130	36093	IPR008262	Lipase, active site	ScanRegExp	PS00120
131	52284	IPR000209	Peptidase S8 and S53, subtilisin, kexin, sedolisin	FPrintScan	PR00723
131	52284	IPR000209	Peptidase S8 and S53, subtilisin, kexin, sedolisin	HMMPfam	PF00082
131	52284	IPR000209	Peptidase S8 and S53, subtilisin, kexin, sedolisin	ScanRegExp	PS00136
131	52284	IPR000209	Peptidase S8 and S53, subtilisin, kexin, sedolisin	ScanRegExp	PS00137
131	52284	IPR000209	Peptidase S8 and S53, subtilisin, kexin, sedolisin	ScanRegExp	PS00138
131	52284	IPR003137	Protease-associated PA	HMMPfam	PF02225
131	52284	IPR003137	Protease-associated PA	ProfileScan	PS50840
132	65752	IPR000169	Peptidase, eukaryotic cysteine peptidase active site	ScanRegExp	PS00639
132	65752	IPR001023	Heat shock protein Hsp70	BlastProDom	PD000089
132	65752	IPR001023	Heat shock protein Hsp70	FPrintScan	PR00301
132	65752	IPR001023	Heat shock protein Hsp70	HMMPfam	PF00012
132	65752	IPR001023	Heat shock protein Hsp70	ScanRegExp	PS00297
132	65752	IPR001023	Heat shock protein Hsp70	ScanRegExp	PS00329
132	65752	IPR001023	Heat shock protein Hsp70	ScanRegExp	PS01036
133	77500	IPR000695	H+ transporting ATPase, proton pump	FPrintScan	PR00120
133	77500	IPR001757	ATPase, E1-E2 type	FPrintScan	PR00119
133	77500	IPR001757	ATPase, E1-E2 type	ScanRegExp	PS00154
133	77500	IPR004014	Cation transporting ATPase, N-terminal	HMMPfam	PF00690
133	77500	IPR005834	Haloacid dehalogenase-like hydrolase	HMMPfam	PF00702
133	77500	IPR006534	Plasma-membrane proton-efflux P-type ATPase	HMMTigr	TIGR01647
133	77500	IPR008250	E1-E2 ATPase-associated region	HMMPfam	PF00122
134	122597	IPR002509	Polysaccharide deacetylase	HMMPfam	PF01522
135	41379
136	79651	IPR000379	Esterase/lipase/thioesterase	ProfileScan	PS50187
137	66813
138	52943	IPR002889	Carbohydrate-binding WSC	HMMPfam	PF01822
138	52943	IPR002889	Carbohydrate-binding WSC	HMMSmart	SM00321
139	74129
140	102066
141	99505	IPR002889	Carbohydrate-binding WSC	HMMPfam	PF01822
141	99505	NULL	NULL	FPrintScan	PR01217
142	82281
143	98847
144	72854
145	106153	IPR001137	Glycoside hydrolase, family 11	FPrintScan	PR00911
145	106153	IPR001137	Glycoside hydrolase, family 11	HMMPfam	PF00457
145	106153	IPR001137	Glycoside hydrolase, family 11	ScanRegExp	PS00776
145	34530	IPR000254	Cellulose-binding region, fungal	BlastProDom	PD001821
145	34530	IPR000254	Cellulose-binding region, fungal	HMMPfam	PF00734
145	34530	IPR000254	Cellulose-binding region, fungal	HMMSmart	SM00236
145	34530	IPR001137	Glycoside hydrolase, family 11	FPrintScan	PR00911
145	34530	IPR001137	Glycoside hydrolase, family 11	HMMPfam	PF00457
145	34530	IPR001137	Glycoside hydrolase, family 11	ScanRegExp	PS00776
145	34530	IPR001137	Glycoside hydrolase, family 11	ScanRegExp	PS00777
146	106439
147	103374
148	101401	IPR001806	Ras GTPase	FPrintScan	PR00449
148	101401	IPR001806	Ras GTPase	HMMPfam	PF00071
148	101401	IPR003577	Ras small GTPase, Ras type	HMMSmart	SM00173
148	101401	IPR003578	Ras small GTPase, Rho type	HMMSmart	SM00174
148	101401	IPR003579	Ras small GTPase, Rab type	HMMSmart	SM00175
148	101401	IPR005225	Small GTP-binding protein domain	HMMTigr	TIGR00231
149	85563	IPR001764	Glycoside hydrolase, family 3, N-terminal	FPrintScan	PR00133
149	85563	IPR001764	Glycoside hydrolase, family 3, N-terminal	HMMPfam	PF00933
149	85563	IPR001764	Glycoside hydrolase, family 3, N-terminal	ScanRegExp	PS00775
150	84951
151	44289	IPR000051	SAM (and some other nucleotide) binding motif	ProfileScan	PS50193
151	44289	IPR010286	Protein of unknown function DUF890	HMMPfam	PF05971
152	100110	IPR000379	Esterase/lipase/thioesterase	ProfileScan	PS50187
152	100110	IPR001563	Peptidase S10, serine carboxypeptidase	BlastProDom	PD001189
152	100110	IPR001563	Peptidase S10, serine carboxypeptidase	FPrintScan	PR00724
152	100110	IPR001563	Peptidase S10, serine carboxypeptidase	HMMPfam	PF00450
152	100110	IPR001563	Peptidase S10, serine carboxypeptidase	ScanRegExp	PS00131
153	49778	IPR001087	Lipolytic enzyme, G-D-S-L	HMMPfam	PF00657
153	49778	IPR001087	Lipolytic enzyme, G-D-S-L	ProfileScan	PS50241
154	80719	IPR001117	Multicopper oxidase, type 1	HMMPfam	PF00394
154	80719	IPR006162	Phosphopantetheine attachment site	ScanRegExp	PS00012
155	34931	IPR000357	HEAT	ProfileScan	PS50077
155	34931	IPR000403	Phosphatidylinositol 3- and 4-kinase	HMMPfam	PF00454
155	34931	IPR000403	Phosphatidylinositol 3- and 4-kinase	HMMSmart	SM00146
155	34931	IPR000403	Phosphatidylinositol 3- and 4-kinase	ProfileScan	PS50290
155	34931	IPR000403	Phosphatidylinositol 3- and 4-kinase	ScanRegExp	PS00915
155	34931	IPR003151	PIK-related kinase, FAT	HMMPfam	PF02259
155	34931	IPR003152	PIK-related kinase, FATC	HMMPfam	PF02260
155	34931	IPR006025	Peptidase M, neutral zinc metallopeptidases, zinc-binding site	ScanRegExp	PS00142
156	47861
157	57678	IPR000595	Cyclic nucleotide-binding	HMMPfam	PF00027
157	57678	IPR000595	Cyclic nucleotide-binding	HMMSmart	SM00100
157	57678	IPR000595	Cyclic nucleotide-binding	ProfileScan	PS50042
157	57678	IPR000595	Cyclic nucleotide-binding	ScanRegExp	PS00889
157	57678	IPR001611	Leucine-rich repeat	HMMPfam	PF00560
157	57678	IPR001810	Cyclin-like F-box	HMMPfam	PF00646
157	57678	IPR001810	Cyclin-like F-box	HMMSmart	SM00256
157	57678	IPR001810	Cyclin-like F-box	ProfileScan	PS50181
157	57678	IPR006553	Leucine-rich repeat, cysteine-containing subtype	HMMSmart	SM00367
157	57678	IPR007089	Leucine-rich repeat, cysteine-containing	ProfileScan	PS50501
158	80249
159	91463	IPR011118	Tannase and feruloyl esterase	HMMPfam	PF07519
160	83807	IPR001841	Zn-finger, RING	ProfileScan	PS50089
161	35947	IPR006597	Sel1-like repeat	HMMSmart	SM00671
162	101368	IPR005607	BSD	HMMPfam	PF03909
162	101368	IPR005607	BSD	ProfileScan	PS50858
163	106448	IPR005103	Glycoside hydrolase, family 61	HMMPfam	PF03443
164	79968	IPR000089	Biotin/lipoyl attachment	HMMPfam	PF00364
164	79968	IPR000120	Amidase	HMMPfam	PF01425
164	79968	IPR003778	Urea amidolyase-related	HMMPfam	PF02626
164	79968	IPR003833	Protein of unknown function DUF213	HMMPfam	PF02682
164	79968	IPR005479	Carbamoyl-phosphate synthase L chain, ATP-binding	HMMPfam	PF02786
164	79968	IPR005479	Carbamoyl-phosphate synthase L chain, ATP-binding	ScanRegExp	PS00866
164	79968	IPR005479	Carbamoyl-phosphate synthase L chain, ATP-binding	ScanRegExp	PS00867
164	79968	IPR005481	Carbamoyl-phosphate synthetase large chain, N-terminal	HMMPfam	PF00289
164	79968	IPR005482	Biotin carboxylase, C-terminal	HMMPfam	PF02785
164	79968	IPR010018	Urea amidolyase-related protein	HMMTigr	TIGR00724
165	85037	IPR006094	FAD linked oxidase, N-terminal	HMMPfam	PF01565
166	84858	IPR000403	Phosphatidylinositol 3- and 4-kinase	HMMPfam	PF00454
166	84858	IPR000403	Phosphatidylinositol 3- and 4-kinase	HMMSmart	SM00146
166	84858	IPR000403	Phosphatidylinositol 3- and 4-kinase	ProfileScan	PS50290
166	84858	IPR003151	PIK-related kinase, FAT	HMMPfam	PF02259
166	84858	IPR003152	PIK-related kinase, FATC	HMMPfam	PF02260
167	102357	IPR002068	Heat shock protein Hsp20	HMMPfam	PF00011
167	102357	IPR002068	Heat shock protein Hsp20	ProfileScan	PS01031
167	56730	IPR002068	Heat shock protein Hsp20	HMMPfam	PF00011
167	56730	IPR002068	Heat shock protein Hsp20	ProfileScan	PS01031
168	54179	IPR002022	Pectate lyase/Amb allergen	HMMPfam	PF00544
168	54179	IPR002022	Pectate lyase/Amb allergen	HMMSmart	SM00656
169	68447	IPR001865	Ribosomal protein S2	ScanRegExp	PS00962
170	52396	IPR000293	Channel forming colicins	ScanRegExp	PS00276
170	52396	IPR002860	Glycosyl hydrolase, BNR repeat	HMMPfam	PF02012
171	86428	IPR001300	Peptidase C2, calpain	ProfileScan	PS50203
172	101480	IPR001425	Bacterial rhodopsin	FPrintScan	PR00251
172	101480	IPR001425	Bacterial rhodopsin	HMMPfam	PF01036
173	39598	NULL	NULL	superfamily	SSF55545
174	100421	IPR001410	DEAD/DEAH box helicase	HMMSmart	SM00487
174	100421	IPR001410	DEAD/DEAH box helicase	ProfileScan	PS50136
174	100421	IPR001650	Helicase, C-terminal	HMMPfam	PF00271
174	100421	IPR001650	Helicase, C-terminal	HMMSmart	SM00490
174	100421	IPR002464	ATP-dependent helicase, DEAH-box	ScanRegExp	PS00690
174	100421	IPR007502	Helicase-associated region	HMMPfam	PF04408
174	100421	IPR011545	DEAD/DEAH box helicase, N-terminal	HMMPfam	PF00270
175	78592	IPR000330	SNF2-related	HMMPfam	PF00176
175	78592	IPR001410	DEAD/DEAH box helicase	HMMSmart	SM00487
175	78592	IPR001650	Helicase, C-terminal	HMMPfam	PF00271
175	78592	IPR001650	Helicase, C-terminal	HMMSmart	SM00490
176	78887
177	82282	IPR003014	N/apple PAN	HMMPfam	PF00024
177	82282	IPR003609	Apple-like	HMMSmart	SM00473
178	23911	IPR000169	Peptidase, eukaryotic cysteine peptidase active site	ScanRegExp	PS00639
179	92903	IPR001687	ATP/GTP-binding site motif A (P-loop)	ProfileScan	PS50101
179	92903	IPR002035	von Willebrand factor, type A	ProfileScan	PS50234
179	92903	IPR003593	AAA ATPase	HMMSmart	SM00382
180	75054
180	93290	IPR007472	Arginine-tRNA-protein transferase, C-terminal	HMMPfam	PF04377
181	30723	IPR000330	SNF2-related	HMMPfam	PF00176
181	30723	IPR001410	DEAD/DEAH box helicase	HMMSmart	SM00487
181	30723	IPR001650	Helicase, C-terminal	HMMPfam	PF00271
182	80347	IPR001683	Phox-like	HMMSmart	SM00312
182	80347	IPR001736	Phospholipase D/Transphosphatidylase	HMMPfam	PF00614
182	80347	IPR001736	Phospholipase D/Transphosphatidylase	HMMSmart	SM00155
182	80347	IPR001736	Phospholipase D/Transphosphatidylase	ProfileScan	PS50035
183	63972	IPR000595	Cyclic nucleotide-binding	HMMPfam	PF00027
183	63972	IPR000595	Cyclic nucleotide-binding	HMMSmart	SM00100
183	63972	IPR000595	Cyclic nucleotide-binding	ProfileScan	PS50042
183	63972	IPR002641	Patatin	HMMPfam	PF01734
184	95941	IPR006710	Glycoside hydrolase, family 43	HMMPfam	PF04616
185	92827	IPR007114	Major facilitator superfamily	ProfileScan	PS50850
186	31909	IPR000262	FMN-dependent alpha-hydroxy acid dehydrogenase	HMMPfam	PF01070
186	31909	IPR001199	Cytochrome b5	BlastProDom	PD000612
186	31909	IPR001199	Cytochrome b5	FPrintScan	PR00363
186	31909	IPR001199	Cytochrome b5	HMMPfam	PF00173
186	31909	IPR001199	Cytochrome b5	ProfileScan	PS50255
186	31909	IPR001199	Cytochrome b5	ScanRegExp	PS00191
186	31909	IPR003009	FMN/related compound-binding core	ProfileScan	PS50264
186	31909	IPR011136	L-lactate dehydrogenase, cytochrome	HMMPIR	PIRSF000135
187	30853	IPR000194	H+-transporting two-sector ATPase, alpha/beta subunit, central region	ScanRegExp	PS00152
187	30853	IPR003961	Fibronectin, type III	HMMPfam	PF00041
187	30853	IPR003961	Fibronectin, type III	HMMSmart	SM00060
188	37893	IPR001841	Zn-finger, RING	HMMPfam	PF00097
188	37893	IPR001841	Zn-finger, RING	HMMSmart	SM00184
188	37893	IPR001841	Zn-finger, RING	ProfileScan	PS50089
188	37893	IPR001841	Zn-finger, RING	ScanRegExp	PS00518
189	87950	IPR001764	Glycoside hydrolase, family 3, N-terminal	FPrintScan	PR00133
189	87950	IPR001764	Glycoside hydrolase, family 3, N-terminal	HMMPfam	PF00933
189	87950	IPR001764	Glycoside hydrolase, family 3, N-terminal	ScanRegExp	PS00775
189	87950	IPR002772	Glycoside hydrolase, family 3, C-terminal	HMMPfam	PF01915
190	28766
191	80786	IPR002114	HPr serine phosphorylation site	ScanRegExp	PS00589
192	58915	IPR007196	CCR4-Not complex component, Not1	HMMPfam	PF04054
192	58915	NULL	NULL	ScanRegExp	PS00453
193	30596
194	84853	IPR007191	Sec8 exocyst complex component specific domain	HMMPfam	PF04048
195	63858
196	58345	IPR000169	Peptidase, eukaryotic cysteine peptidase active site	ScanRegExp	PS00639
196	58345	IPR002017	Spectrin repeat	ProfileScan	PS50083
196	58345	IPR003593	AAA ATPase	HMMSmart	SM00382
196	58345	IPR004273	Dynein heavy chain	HMMPfam	PF03028
197	32130
198	98643
199	68433	IPR000379	Esterase/lipase/thioesterase	ProfileScan	PS50187
199	68433	IPR001138	Fungal transcriptional regulatory protein, N-terminal	HMMPfam	PF00172
199	68433	IPR001138	Fungal transcriptional regulatory protein, N-terminal	HMMSmart	SM00066
199	68433	IPR001138	Fungal transcriptional regulatory protein, N-terminal	ProfileScan	PS50048
199	68433	IPR001138	Fungal transcriptional regulatory protein, N-terminal	ScanRegExp	PS00463
199	68433	IPR003089	Alpha/beta hydrolase	FPrintScan	PR00111
199	68433	IPR007087	Zn-finger, C2H2 type	HMMPfam	PF00096
199	68433	IPR007087	Zn-finger, C2H2 type	HMMSmart	SM00355
199	68433	IPR007087	Zn-finger, C2H2 type	ProfileScan	PS50157
199	68433	IPR007087	Zn-finger, C2H2 type	ScanRegExp	PS00028
200	97337
201	74762	IPR000073	Alpha/beta hydrolase fold	HMMPfam	PF00561
201	74762	IPR000379	Esterase/lipase/thioesterase	ProfileScan	PS50187
201	74762	IPR003089	Alpha/beta hydrolase	FPrintScan	PR00111
201	74762	IPR008262	Lipase, active site	ScanRegExp	PS00120
202	47830
203	41818	IPR000719	Protein kinase	BlastProDom	PD000001
203	41818	IPR000719	Protein kinase	HMMPfam	PF00069
203	41818	IPR000719	Protein kinase	ProfileScan	PS50011
203	41818	IPR000719	Protein kinase	ScanRegExp	PS00107
203	41818	IPR001014	Ribosomal L23 protein	ScanRegExp	PS00050
203	41818	IPR001245	Tyrosine protein kinase	HMMSmart	SM00219
203	41818	IPR002290	Serine/threonine protein kinase	HMMSmart	SM00220
203	41818	IPR004827	Basic-leucine zipper (bZIP) transcription factor	ScanRegExp	PS00036
203	41818	IPR008271	Serine/threonine protein kinase, active site	ScanRegExp	PS00108
204	87247	IPR007312	Phosphoesterase	HMMPfam	PF04185
205	38713	IPR003395	SMC protein, N-terminal	HMMPfam	PF02463
205	38713	IPR003405	Structural maintenance of chromosome protein SMC, C-terminal	HMMPfam	PF02483
205	38713	IPR003439	ABC transporter	ProfileScan	PS50100
205	38713	IPR010935	SMCs flexible hinge	HMMPfam	PF06470
206	75637
207	48646	IPR000577	Carbohydrate kinase, FGGY	ScanRegExp	PS00445
207	48646	IPR005828	General substrate transporter	HMMPfam	PF00083
207	48646	IPR007114	Major facilitator superfamily	ProfileScan	PS50850
208	72599	IPR000379	Esterase/lipase/thioesterase	ProfileScan	PS50187
208	72599	IPR001853	DSBA oxidoreductase	HMMPfam	PF01323
209	95449	IPR001547	Glycoside hydrolase, family 5	ScanRegExp	PS00659
209	95449	IPR007120	RNA polymerase Rpb2, domain 6	HMMPfam	PF00562
209	95449	IPR007121	RNA polymerase, beta subunit	ScanRegExp	PS01166
209	95449	IPR007641	RNA polymerase Rpb2, domain 7	HMMPfam	PF04560
209	95449	IPR007642	RNA polymerase Rpb2, domain 2	HMMPfam	PF04561
209	95449	IPR007644	RNA polymerase beta subunit	HMMPfam	PF04563
209	95449	IPR007645	RNA polymerase Rpb2, domain 3	HMMPfam	PF04565
209	95449	IPR007647	RNA polymerase Rpb2, domain 5	HMMPfam	PF04567
209	95449	IPR009674	RNA polymerase I, Rpa2 specific	HMMPfam	PF06883
210	82261
211	49847	IPR006094	FAD linked oxidase, N-terminal	HMMPfam	PF01565
212	46277	IPR004304	Acetamidase/Formamidase	HMMPfam	PF03069
213	101260	IPR000547	7-Fold repeat in clathrin and VPS proteins	HMMPfam	PF00637
213	101260	IPR000547	7-Fold repeat in clathrin and VPS proteins	HMMSmart	SM00299
213	101260	IPR000547	7-Fold repeat in clathrin and VPS proteins	ProfileScan	PS50236
213	101260	IPR001473	Clathrin propeller, N-terminal	HMMPfam	PF01394
214	38285	IPR000330	SNF2-related	HMMPfam	PF00176
214	38285	IPR000953	Chromo	HMMPfam	PF00385
214	38285	IPR000953	Chromo	HMMSmart	SM00298
214	38285	IPR000953	Chromo	ProfileScan	PS50013
214	38285	IPR001005	Myb, DNA-binding	ScanRegExp	PS00334
214	38285	IPR001410	DEAD/DEAH box helicase	HMMSmart	SM00487
214	38285	IPR001650	Helicase, C-terminal	HMMPfam	PF00271
214	38285	IPR001650	Helicase, C-terminal	HMMSmart	SM00490
215	64318	IPR005755	Ribosomal protein L13, archea and eukaryotic form	HMMTigr	TIGR01077
215	64318	IPR005822	Ribosomal protein L13	BlastProDom	PD001791
215	64318	IPR005822	Ribosomal protein L13	HMMPfam	PF00572
215	64318	IPR005822	Ribosomal protein L13	ScanRegExp	PS00783
216	44741
217	75273	IPR007234	Vps53-like, N-terminal	HMMPfam	PF04100
218	72074	IPR002197	Helix-turn-helix, Fis-type	FPrintScan	PR01590
218	72074	IPR003009	FMN/related compound-binding core	ProfileScan	PS50264
218	72074	IPR004136	2-nitropropane dioxygenase, NPD	HMMPfam	PF03060
219	35620	IPR006094	FAD linked oxidase, N-terminal	HMMPfam	PF01565
220	35658	IPR009060	UBA-like	superfamily	SSF46934
221	81544	IPR000209	Peptidase S8 and S53, subtilisin, kexin, sedolisin	ScanRegExp	PS00138
222	54810	IPR001849	Pleckstrin-like	HMMPfam	PF00169
222	54810	IPR001849	Pleckstrin-like	HMMSmart	SM00233
222	54810	IPR001849	Pleckstrin-like	ProfileScan	PS50003
222	54810	IPR004182	GRAM	HMMPfam	PF02893
222	54810	IPR004182	GRAM	HMMSmart	SM00568
222	54810	IPR004276	Glycosyl transferase, family 28	HMMPfam	PF03033
223	86789	IPR003822	Paired amphipathic helix	HMMPfam	PF02671
223	86789	NULL	NULL	ScanRegExp	PS00038
224	77058	IPR000834	Peptidase M14, carboxypeptidase A	HMMPfam	PF00246
225	75777	IPR001138	Fungal transcriptional regulatory protein, N-terminal	HMMPfam	PF00172
225	75777	IPR001138	Fungal transcriptional regulatory protein, N-terminal	HMMSmart	SM00066
225	75777	IPR001138	Fungal transcriptional regulatory protein, N-terminal	ProfileScan	PS50048
225	75777	IPR001138	Fungal transcriptional regulatory protein, N-terminal	ScanRegExp	PS00463
225	75777	IPR002409	Aflatoxin biosynthesis regulatory protein	FPrintScan	PR00755
226	59700	IPR000558	Histone H2B	BlastProDom	PD000497
226	59700	IPR000558	Histone H2B	FPrintScan	PR00621
226	59700	IPR000558	Histone H2B	HMMSmart	SM00427
226	59700	IPR000558	Histone H2B	ScanRegExp	PS00357
226	59700	IPR007124	Histone-fold/TFIID-TAF/NF-Y	ProfileScan	PS50028
226	59700	IPR007125	Histone core	HMMPfam	PF00125
227	85894	IPR002086	Aldehyde dehydrogenase	HMMPfam	PF00171
227	85894	IPR002086	Aldehyde dehydrogenase	ScanRegExp	PS00070
227	85894	IPR002086	Aldehyde dehydrogenase	ScanRegExp	PS00687
227	85894	IPR005931	delta-1-pyrroline-5-carboxylate dehydrogenase 1	HMMTigr	TIGR01236
228	68433	IPR000379	Esterase/lipase/thioesterase	ProfileScan	PS50187
228	68433	IPR001138	Fungal transcriptional regulatory protein, N-terminal	HMMPfam	PF00172
228	68433	IPR001138	Fungal transcriptional regulatory protein, N-terminal	HMMSmart	SM00066
228	68433	IPR001138	Fungal transcriptional regulatory protein, N-terminal	ProfileScan	PS50048
228	68433	IPR001138	Fungal transcriptional regulatory protein, N-terminal	ScanRegExp	PS00463
228	68433	IPR003089	Alpha/beta hydrolase	FPrintScan	PR00111
228	68433	IPR007087	Zn-finger, C2H2 type	HMMPfam	PF00096
228	68433	IPR007087	Zn-finger, C2H2 type	HMMSmart	SM00355
228	68433	IPR007087	Zn-finger, C2H2 type	ProfileScan	PS50157
228	68433	IPR007087	Zn-finger, C2H2 type	ScanRegExp	PS00028
229	25809
230	63514	IPR000795	Protein synthesis factor, GTP-binding	FPrintScan	PR00315
230	63514	IPR000795	Protein synthesis factor, GTP-binding	HMMPfam	PF00009
230	63514	IPR000795	Protein synthesis factor, GTP-binding	ScanRegExp	PS00301
230	63514	IPR004160	Elongation factor Tu, C-terminal	HMMPfam	PF03143
230	63514	IPR004161	Elongation factor Tu, domain 2	HMMPfam	PF03144
230	63514	IPR004541	Translation elongation factor Tu	HMMTigr	TIGR00485
230	63514	IPR005225	Small GTP-binding protein domain	HMMTigr	TIGR00231
231	39784
232	81588
233	41038	IPR001200	Phosducin	HMMPfam	PF02114
234	92554	IPR007902	CHL4	HMMPfam	PF05238
235	74696	IPR005135	Endonuclease/exonuclease/phosphatase	HMMPfam	PF03372
236	99711
237	122449	IPR000490	Glycoside hydrolase, family 17	HMMPfam	PF00332
238	123202	IPR001140	ABC transporter, transmembrane region	HMMPfam	PF00664
238	123202	IPR001687	ATP/GTP-binding site motif A (P-loop)	ProfileScan	PS50101
238	123202	IPR003439	ABC transporter	BlastProDom	PD000006
238	123202	IPR003439	ABC transporter	HMMPfam	PF00005
238	123202	IPR003439	ABC transporter	ProfileScan	PS50100
238	123202	IPR003439	ABC transporter	ProfileScan	PS50893
238	123202	IPR003439	ABC transporter	ScanRegExp	PS00211
238	123202	IPR003593	AAA ATPase	HMMSmart	SM00382
239	44201	IPR000924	Glutamyl-tRNA synthetase, class Ic	FPrintScan	PR00987
239	44201	IPR000924	Glutamyl-tRNA synthetase, class Ic	HMMPfam	PF00749
239	44201	IPR000924	Glutamyl-tRNA synthetase, class Ic	HMMPfam	PF03950
239	44201	IPR001412	Aminoacyl-tRNA synthetase, class I	ScanRegExp	PS00178
239	44201	IPR004514	Glutaminyl-tRNA synthetase	HMMTigr	TIGR00440
240	89599	IPR007219	Fungal specific transcription factor	HMMPfam	PF04082
241	78627
242	89813	IPR001425	Bacterial rhodopsin	FPrintScan	PR00251
242	89813	IPR001425	Bacterial rhodopsin	HMMPfam	PF01036
243	103636
244	83479	IPR001138	Fungal transcriptional regulatory protein, N-terminal	HMMPfam	PF00172
244	83479	IPR001138	Fungal transcriptional regulatory protein, N-terminal	HMMSmart	SM00066
244	83479	IPR001138	Fungal transcriptional regulatory protein, N-terminal	ProfileScan	PS50048
245	79260
246	85342	IPR000782	Beta-Ig-H3/fasciclin	HMMPfam	PF02469
246	85342	IPR000782	Beta-Ig-H3/fasciclin	HMMSmart	SM00554
246	85342	IPR000782	Beta-Ig-H3/fasciclin	ProfileScan	PS50213
247	53445	IPR006094	FAD linked oxidase, N-terminal	HMMPfam	PF01565
248	72534	IPR001189	Manganese and iron superoxide dismutase	BlastProDom	PD000475
248	72534	IPR001189	Manganese and iron superoxide dismutase	FPrintScan	PR01703
248	72534	IPR001189	Manganese and iron superoxide dismutase	HMMPfam	PF00081
248	72534	IPR001189	Manganese and iron superoxide dismutase	HMMPfam	PF02777
248	72534	IPR001189	Manganese and iron superoxide dismutase	ScanRegExp	PS00088
249	65446	IPR000886	Endoplasmic reticulum targeting sequence	ScanRegExp	PS00014
249	65446	IPR001155	NADH:flavin oxidoreductase/NADH oxidase	HMMPfam	PF00724
249	65446	IPR005788	Disulphide isomerase	HMMTigr	TIGR01126
249	65446	IPR005792	Protein disulphide isomerase	HMMTigr	TIGR01130
249	65446	IPR006662	Thioredoxin-related	FPrintScan	PR00421
249	65446	IPR006662	Thioredoxin-related	HMMPfam	PF00085
249	65446	IPR006662	Thioredoxin-related	ScanRegExp	PS00194
249	65446	IPR006663	Thioredoxin domain 2	ProfileScan	PS50223
250	58007	IPR001567	Peptidase M3A and M3B, thimet/oligopeptidase F	HMMPfam	PF01432
250	58007	IPR006025	Peptidase M, neutral zinc metallopeptidases, zinc-binding site	ScanRegExp	PS00142
251	93451	IPR001063	Ribosomal protein L22/L17	BlastProDom	PD001032
252	90422	IPR002081	Deoxyribodipyrimidine photolyase, class 1	FPrintScan	PR00147
252	90422	IPR002081	Deoxyribodipyrimidine photolyase, class 1	ScanRegExp	PS00394
252	90422	IPR005101	DNA photolyase, FAD-binding	HMMPfam	PF03441
252	90422	IPR006050	DNA photolyase, N-terminal	HMMPfam	PF00875
252	90422	IPR006051	DNA photolyase, FAD- binding N-terminal	BlastProDom	PD004390
253	60055	IPR007188	Arp2/3 complex, 34kDa subunit p34-Arc	HMMPfam	PF04045
254	123279	IPR001764	Glycoside hydrolase, family 3, N-terminal	FPrintScan	PR00133
254	123279	IPR001764	Glycoside hydrolase, family 3, N-terminal	HMMPfam	PF00933
254	123279	IPR002772	Glycoside hydrolase, family 3, C-terminal	HMMPfam	PF01915
255	59877	IPR000173	Glyceraldehyde 3-phosphate dehydrogenase	FPrintScan	PR00078
255	59877	IPR000173	Glyceraldehyde 3-phosphate dehydrogenase	HMMPfam	PF00044
255	59877	IPR000173	Glyceraldehyde 3-phosphate dehydrogenase	HMMPfam	PF02800
255	59877	IPR000173	Glyceraldehyde 3-phosphate dehydrogenase	ScanRegExp	PS00071
255	59877	IPR006424	Glyceraldehyde-3-phosphate dehydrogenase, type I	HMMTigr	TIGR01534
255	59877	IPR011596	Glyceraldehyde 3-phosphate dehydrogenase-like	BlastProDom	PD007761
256	52779	IPR003137	Protease-associated PA	HMMPfam	PF02225
256	52779	IPR003137	Protease-associated PA	ProfileScan	PS50840
256	52779	IPR007484	Peptidase M28	HMMPfam	PF04389
257	65042
258	99942
259	88405
260	36693	IPR001384	Peptidase M35, deuterolysin	FPrintScan	PR00768
260	36693	IPR001384	Peptidase M35, deuterolysin	HMMPfam	PF02102
261	70605	IPR001117	Multicopper oxidase, type 1	HMMPfam	PF00394
261	70605	IPR001117	Multicopper oxidase, type 1	ScanRegExp	PS00079
261	70605	IPR002355	Multicopper oxidase, copper-binding site	ScanRegExp	PS00080
262	51324	IPR001929	Germin	FPrintScan	PR00325
262	51324	IPR006045	Cupin	HMMPfam	PF00190
263	106525
264	102125	IPR000205	NAD-binding site	ProfileScan	PS50205
265	46452	IPR000379	Esterase/lipase/thioesterase	ProfileScan	PS50187
265	46452	IPR007087	Zn-finger, C2H2 type	ScanRegExp	PS00028
265	46452	IPR008262	Lipase, active site	ScanRegExp	PS00120
266	98018	IPR000834	Peptidase M14, carboxypeptidase A	HMMPfam	PF00246
266	98018	IPR000834	Peptidase M14, carboxypeptidase A	HMMSmart	SM00631
267	96429	IPR002828	Survival protein SurE	BlastProDom	PD005378
267	96429	IPR002828	Survival protein SurE	HMMPfam	PF01975
268	95877	IPR001929	Germin	FPrintScan	PR00325
268	95877	IPR006045	Cupin	HMMPfam	PF00190
269	42631	IPR000379	Esterase/lipase/thioesterase	ProfileScan	PS50187
270	3047
271	59628	IPR000577	Carbohydrate kinase, FGGY	HMMPfam	PF00370
271	59628	IPR000577	Carbohydrate kinase, FGGY	HMMPfam	PF02782
271	59628	IPR000577	Carbohydrate kinase, FGGY	ScanRegExp	PS00445
271	59628	IPR000577	Carbohydrate kinase, FGGY	ScanRegExp	PS00933
271	59628	IPR005999	Glycerol kinase	HMMTigr	TIGR01311
272	77168	IPR000383	Peptidase S15	HMMPfam	PF02129
273	105804
274	85379	IPR001138	Fungal transcriptional regulatory protein, N-terminal	HMMPfam	PF00172
274	85379	IPR001138	Fungal transcriptional regulatory protein, N-terminal	HMMSmart	SM00066
274	85379	IPR001138	Fungal transcriptional regulatory protein, N-terminal	ProfileScan	PS50048
274	85379	IPR001138	Fungal transcriptional regulatory protein, N-terminal	ScanRegExp	PS00463
275	99507
276	59329	IPR000795	Protein synthesis factor, GTP-binding	FPrintScan	PR00315
276	59329	IPR000795	Protein synthesis factor, GTP-binding	HMMPfam	PF00009
276	59329	IPR000795	Protein synthesis factor, GTP-binding	ScanRegExp	PS00301
276	59329	IPR004160	Elongation factor Tu, C-terminal	HMMPfam	PF03143
276	59329	IPR004161	Elongation factor Tu, domain 2	HMMPfam	PF03144
276	59329	IPR004539	Translation elongation factor EF-1, alpha subunit	HMMTigr	TIGR00483
277	51284	IPR000209	Peptidase S8 and S53, subtilisin, kexin, sedolisin	FPrintScan	PR00723
277	51284	IPR000209	Peptidase S8 and S53, subtilisin, kexin, sedolisin	HMMPfam	PF00082
277	51284	IPR000209	Peptidase S8 and S53, subtilisin, kexin, sedolisin	ScanRegExp	PS00136
277	51284	IPR000209	Peptidase S8 and S53, subtilisin, kexin, sedolisin	ScanRegExp	PS00137
277	51284	IPR000209	Peptidase S8 and S53, subtilisin, kexin, sedolisin	ScanRegExp	PS00138
277	51284	IPR010259	Proteinase inhibitor I9, subtilisin propeptide	HMMPfam	PF05922
278	122630	IPR000379	Esterase/lipase/thioesterase	ProfileScan	PS50187
278	122630	IPR000675	Cutinase	HMMPfam	PF01083
279	102394	IPR000836	Phosphoribosyltransferase	HMMPfam	PF00156
279	102394	IPR002375	Purine/pyrimidine phosphoribosyl transferase	ScanRegExp	PS00103
280	100823	IPR001395	Aldo/keto reductase	BlastProDom	PD000288
280	100823	IPR001395	Aldo/keto reductase	FPrintScan	PR00069
280	100823	IPR001395	Aldo/keto reductase	HMMPfam	PF00248
282	85139
283	46646	IPR001932	Protein phosphatase 2C-like	HMMSmart	SM00331
283	46646	IPR001932	Protein phosphatase 2C-like	HMMSmart	SM00332
284	103119	IPR006662	Thioredoxin-related	FPrintScan	PR00421
284	103119	IPR006662	Thioredoxin-related	HMMPfam	PF00085
284	103119	IPR006662	Thioredoxin-related	ScanRegExp	PS00194
284	103119	IPR006663	Thioredoxin domain 2	ProfileScan	PS50223
284	103119	IPR010400	Protein of unknown function DUF1000	HMMPfam	PF06201
285	98192	IPR002227	Tyrosinase	FPrintScan	PR00092
285	98192	IPR002227	Tyrosinase	ScanRegExp	PS00498
286	93370	IPR007568	RTA1 like protein	HMMPfam	PF04479
287	91549	IPR001002	Chitin-binding, type 1	BlastProDom	PD000609
287	91549	IPR001002	Chitin-binding, type 1	HMMPfam	PF00187
287	91549	IPR002889	Carbohydrate-binding WSC	HMMPfam	PF01822
287	91549	IPR002889	Carbohydrate-binding WSC	HMMSmart	SM00321
288	82946
289	64426	IPR000051	SAM (and some other nucleotide) binding motif	ProfileScan	PS50193
289	64426	IPR001601	Generic methyltransferase	ProfileScan	PS50124
290	53490
291	46803	IPR001951	Histone H4	BlastProDom	PD001827
291	46803	IPR001951	Histone H4	FPrintScan	PR00623
291	46803	IPR001951	Histone H4	HMMSmart	SM00417
291	46803	IPR001951	Histone H4	ScanRegExp	PS00047
291	46803	IPR007124	Histone-fold/TFIID-TAF/NF-Y	ProfileScan	PS50028
291	46803	IPR007125	Histone core	HMMPfam	PF00125
291	47719	IPR001951	Histone H4	BlastProDom	PD001827
291	47719	IPR001951	Histone H4	FPrintScan	PR00623
291	47719	IPR001951	Histone H4	HMMSmart	SM00417
291	47719	IPR001951	Histone H4	ScanRegExp	PS00047
291	47719	IPR007124	Histone-fold/TFIID-TAF/NF-Y	ProfileScan	PS50028
291	47719	IPR007125	Histone core	HMMPfam	PF00125
292	41392	IPR001087	Lipolytic enzyme, G-D-S-L	HMMPfam	PF00657
293	106136
294	102651
295	102374
296	101622	IPR003204	Cytochrome c oxidase, subunit Va	HMMPfam	PF02284
297	100964
298	99057	IPR001899	Surface protein from Gram-positive cocci, anchor region	HMMTigr	TIGR01167
299	90065	IPR000717	Proteasome component region PCI	HMMPfam	PF01399
299	90065	IPR000717	Proteasome component region PCI	HMMSmart	SM00088
299	90065	IPR000717	Proteasome component region PCI	ProfileScan	PS50250
300	99954	IPR001851	Bacterial inner-membrane translocator	ProfileScan	PS50281
300	99954	IPR010816	Heterokaryon incompatibility Het-C	HMMPfam	PF07217
301	88472
302	88729	IPR001410	DEAD/DEAH box helicase	HMMSmart	SM00487
302	88729	IPR001410	DEAD/DEAH box helicase	ProfileScan	PS50136
302	88729	IPR001650	Helicase, C-terminal	HMMPfam	PF00271
302	88729	IPR001650	Helicase, C-terminal	HMMSmart	SM00490
302	88729	IPR011545	DEAD/DEAH box helicase, N-terminal	HMMPfam	PF00270
303	40882
304	83163	IPR000977	ATP-dependent DNA ligase	ScanRegExp	PS00697
305	95029	IPR001687	ATP/GTP-binding site motif A (P-loop)	ProfileScan	PS50101
305	95029	IPR003439	ABC transporter	BlastProDom	PD000006
305	95029	IPR003439	ABC transporter	HMMPfam	PF00005
305	95029	IPR003439	ABC transporter	ProfileScan	PS50100
305	95029	IPR003439	ABC transporter	ProfileScan	PS50893
305	95029	IPR003439	ABC transporter	ScanRegExp	PS00211
305	95029	IPR003593	AAA ATPase	HMMSmart	SM00382
305	95029	IPR010929	CDR ABC transporter	HMMPfam	PF06422
306	76476	IPR000629	ATP-dependent helicase, DEAD-box	ScanRegExp	PS00039
306	76476	IPR001664	Intermediate filament protein	ScanRegExp	PS00226
306	76476	IPR003439	ABC transporter	ScanRegExp	PS00211
307	44083	IPR006680	Amidohydrolase	HMMPfam	PF01979
308	87590
309	99752	IPR010308	Fungal protein of unknown function DUF907	HMMPfam	PF06011
310	46230	IPR000051	SAM (and some other nucleotide) binding motif	ProfileScan	PS50193
310	46230	IPR000794	Beta-ketoacyl synthase	HMMPfam	PF00109
310	46230	IPR000794	Beta-ketoacyl synthase	HMMPfam	PF02801
310	46230	IPR000794	Beta-ketoacyl synthase	ScanRegExp	PS00606
310	46230	IPR001227	Acyl transferase region	HMMPfam	PF00698
310	46230	IPR001601	Generic methyltransferase	ProfileScan	PS50124
310	46230	IPR002085	Zinc-containing alcohol dehydrogenase superfamily	HMMPfam	PF00107
310	46230	IPR006162	Phosphopantetheine attachment site	ScanRegExp	PS00012
310	46230	IPR006163	Phosphopantetheine-binding	ProfileScan	PS50075
311	50386	IPR004140	Exo70 exocyst complex subunit	HMMPfam	PF03081
312	32128
313	73925	IPR002109	Glutaredoxin	FPrintScan	PR00160
313	73925	IPR002109	Glutaredoxin	HMMPfam	PF00462
313	73925	IPR002109	Glutaredoxin	ScanRegExp	PS00195
313	73925	IPR006662	Thioredoxin-related	ScanRegExp	PS00194
313	73925	IPR006663	Thioredoxin domain 2	ProfileScan	PS50223
314	92970
315	57694
316	64056	IPR000178	Initiation factor 2	BlastProDom	PD186100
316	64056	IPR000795	Protein synthesis factor, GTP-binding	FPrintScan	PR00315
316	64056	IPR000795	Protein synthesis factor, GTP-binding	HMMPfam	PF00009
316	64056	IPR005225	Small GTP-binding protein domain	HMMTigr	TIGR00231
317	88716
318	63014	IPR004193	Glycoside hydrolase, family 13, N-terminal	HMMPfam	PF02922
318	63014	IPR006047	Alpha amylase, catalytic region	HMMPfam	PF00128
318	63014	IPR006589	Alpha amylase, catalytic subdomain	HMMSmart	SM00642
319	96752	IPR002312	Aspartyl-tRNA synthetase, class IIb	FPrintScan	PR01042
319	96752	IPR004364	tRNA synthetase, class II (D, K and N)	HMMPfam	PF00152
319	96752	IPR004523	Aspartyl-tRNA synthetase archea/euk type	HMMTigr	TIGR00458
319	96752	IPR006195	Aminoacyl-transfer RNA synthetase, class II	ProfileScan	PS50862
320	43049	IPR000873	AMP-dependent synthetase and ligase	HMMPfam	PF00501
320	43049	IPR001451	Bacterial transferase hexapeptide repeat	HMMPfam	PF00132
320	43049	IPR006163	Phosphopantetheine-binding	HMMPfam	PF00550
320	43049	IPR006163	Phosphopantetheine-binding	ProfileScan	PS50075
321	96414	IPR000182	GCN5-related N-acetyltransferase	HMMPfam	PF00583
321	96414	IPR002300	Aminoacyl-tRNA synthetase, class Ia	HMMPfam	PF00133
321	96414	IPR002304	Methionyl-tRNA synthetase, class Ia	FPrintScan	PR01041
322	77405
323	53688	IPR001944	Glycoside hydrolase, family 35	FPrintScan	PR00742
323	53688	IPR001944	Glycoside hydrolase, family 35	HMMPfam	PF01301
324	34430	IPR007245	Gpi16 subunit, GPI transamidase component	HMMPfam	PF04113
325	24864	IPR000719	Protein kinase	BlastProDom	PD000001
325	24864	IPR000719	Protein kinase	ProfileScan	PS50011
325	24864	IPR001202	WW/Rsp5/WWP	ScanRegExp	PS01159
325	24864	IPR002290	Serine/threonine protein kinase	HMMSmart	SM00220
326	123164
327	102366	IPR001806	Ras GTPase	FPrintScan	PR00449
327	102366	IPR003579	Ras small GTPase, Rab type	HMMSmart	SM00175
327	102366	IPR005225	Small GTP-binding protein domain	HMMTigr	TIGR00231
327	102366	IPR006687	GTP-binding protein SAR1	HMMSmart	SM00178
327	102366	IPR006688	ADP-ribosylation factor	HMMSmart	SM00177
327	102366	IPR006688	ADP-ribosylation factor	ScanRegExp	PS01019
327	102366	IPR006689	ARF/SAR superfamily	FPrintScan	PR00328
327	102366	IPR006689	ARF/SAR superfamily	HMMPfam	PF00025
328	44809	IPR004276	Glycosyl transferase, family 28	HMMPfam	PF03033
329	60582	IPR000218	Ribosomal protein L14b/L23e	BlastProDom	PD001093
329	60582	IPR000218	Ribosomal protein L14b/L23e	HMMPfam	PF00238
329	60582	IPR000218	Ribosomal protein L14b/L23e	ScanRegExp	PS00049
329	60582	IPR005745	Ribosomal protein L14, bacterial and organelle form	HMMTigr	TIGR01067
330	68215	IPR000235	Ribosomal protein S7	BlastProDom	PD000817
330	68215	IPR000235	Ribosomal protein S7	HMMPfam	PF00177
330	68215	IPR000235	Ribosomal protein S7	HMMPIR	PIRSF002122
330	68215	IPR000235	Ribosomal protein S7	ScanRegExp	PS00052
330	68215	IPR005716	Ribosomal protein S7, eukaryotic and archaeal form	HMMTigr	TIGR01028
331	94350	IPR001757	ATPase, E1-E2 type	FPrintScan	PR00119
331	94350	IPR001757	ATPase, E1-E2 type	ScanRegExp	PS00154
331	94350	IPR005834	Haloacid dehalogenase-like hydrolase	HMMPfam	PF00702
331	94350	IPR006544	P-type ATPase of unknown pump specificity (type V)	HMMTigr	TIGR01657
331	94350	IPR008250	E1-E2 ATPase-associated region	HMMPfam	PF00122
332	37567	IPR000357	HEAT	ProfileScan	PS50077
333	75701	IPR001138	Fungal transcriptional regulatory protein, N-terminal	FPrintScan	PR00054
333	75701	IPR001138	Fungal transcriptional regulatory protein, N-terminal	HMMPfam	PF00172
333	75701	IPR001138	Fungal transcriptional regulatory protein, N-terminal	HMMSmart	SM00066
333	75701	IPR001138	Fungal transcriptional regulatory protein, N-terminal	ProfileScan	PS50048
333	75701	IPR001138	Fungal transcriptional regulatory protein, N-terminal	ScanRegExp	PS00463
333	75701	IPR007219	Fungal specific transcription factor	HMMPfam	PF04082
334	61141	IPR010678	Protein of unknown function DUF1253	HMMPfam	PF06862
335	102170	IPR007461	Protein of unknown function DUF500	HMMPfam	PF04366
336	89214	IPR001138	Fungal transcriptional regulatory protein, N-terminal	FPrintScan	PR00054
336	89214	IPR001138	Fungal transcriptional regulatory protein, N-terminal	HMMPfam	PF00172
336	89214	IPR001138	Fungal transcriptional regulatory protein, N-terminal	HMMSmart	SM00066
336	89214	IPR001138	Fungal transcriptional regulatory protein, N-terminal	ProfileScan	PS50048
336	89214	IPR001138	Fungal transcriptional regulatory protein, N-terminal	ScanRegExp	PS00463
336	89214	IPR007219	Fungal specific transcription factor	HMMPfam	PF04082
337	48646	IPR000577	Carbohydrate kinase, FGGY	ScanRegExp	PS00445
337	48646	IPR005828	General substrate transporter	HMMPfam	PF00083
337	48646	IPR007114	Major facilitator superfamily	ProfileScan	PS50850
338	106409	IPR001087	Lipolytic enzyme, G-D-S-L	HMMPfam	PF00657
339	75789	IPR001138	Fungal transcriptional regulatory protein, N-terminal	HMMPfam	PF00172
339	75789	IPR001138	Fungal transcriptional regulatory protein, N-terminal	HMMSmart	SM00066
339	75789	IPR001138	Fungal transcriptional regulatory protein, N-terminal	ProfileScan	PS50048
339	75789	IPR001138	Fungal transcriptional regulatory protein, N-terminal	ScanRegExp	PS00463
339	75789	IPR007219	Fungal specific transcription factor	HMMPfam	PF04082
340	78838	IPR000719	Protein kinase	BlastProDom	PD000001
340	78838	IPR000719	Protein kinase	ProfileScan	PS50011
340	78838	IPR001789	Response regulator receiver	BlastProDom	PD000039
340	78838	IPR001789	Response regulator receiver	HMMPfam	PF00072
340	78838	IPR001789	Response regulator receiver	HMMSmart	SM00448
340	78838	IPR001789	Response regulator receiver	ProfileScan	PS50110
340	78838	IPR002290	Serine/threonine protein kinase	HMMSmart	SM00220
340	78838	IPR003018	GAF	HMMPfam	PF01590
340	78838	IPR003594	ATP-binding region, ATPase-like	HMMPfam	PF02518
340	78838	IPR003594	ATP-binding region, ATPase-like	HMMSmart	SM00387
340	78838	IPR003661	Histidine kinase A, N-terminal	HMMPfam	PF00512
340	78838	IPR003661	Histidine kinase A, N-terminal	HMMSmart	SM00388
340	78838	IPR004358	Bacterial sensor protein, C-terminal	FPrintScan	PR00344
340	78838	IPR005467	Histidine kinase	ProfileScan	PS50109
341	100177
342	91987	IPR007741	Mitochondrial ribosome	HMMPfam	PF05047
343	100890	IPR001680	G-protein beta WD-40 repeat	BlastProDom	PD000018
343	100890	IPR001680	G-protein beta WD-40 repeat	FPrintScan	PR00320
343	100890	IPR001680	G-protein beta WD-40 repeat	HMMPfam	PF00400
343	100890	IPR001680	G-protein beta WD-40 repeat	HMMSmart	SM00320
343	100890	IPR001680	G-protein beta WD-40 repeat	ProfileScan	PS50082
343	100890	IPR001680	G-protein beta WD-40 repeat	ProfileScan	PS50294
344	94298
345	48101
346	37937
347	45738	IPR000205	NAD-binding site	ProfileScan	PS50205
348	30581	IPR000644	CBS	HMMPfam	PF00571
348	30581	IPR000644	CBS	HMMSmart	SM00116
348	30581	IPR000644	CBS	ProfileScan	PS50147
348	30581	IPR001093	IMP dehydrogenase/GMP reductase	HMMPfam	PF00478
348	30581	IPR003009	FMN/related compound-binding core	ProfileScan	PS50264
348	30581	IPR005990	IMP dehydrogenase	HMMTigr	TIGR01302
349	96028	IPR000572	Oxidoreductase, molybdopterin binding	HMMPfam	PF00174
349	96028	IPR001199	Cytochrome b5	BlastProDom	PD000612
349	96028	IPR001199	Cytochrome b5	HMMPfam	PF00173
349	96028	IPR001199	Cytochrome b5	ProfileScan	PS50255
349	96028	IPR005066	Mo-co oxidoreductase dimerisation domain	HMMPfam	PF03404
349	96028	IPR008335	Eukaryotic molybdopterin oxidoreductase	FPrintScan	PR00407
350	75256
351	88187	IPR002198	Short-chain dehydrogenase/reductase SDR	FPrintScan	PR00080
351	88187	IPR002198	Short-chain dehydrogenase/reductase SDR	HMMPfam	PF00106
351	88187	IPR002198	Short-chain dehydrogenase/reductase SDR	ScanRegExp	PS00061
351	88187	IPR002347	Glucose/ribitol dehydrogenase	FPrintScan	PR00081
352	54849	IPR000508	Peptidase S26, signal peptidase I	ScanRegExp	PS00761
352	54849	IPR006353	HAD-superfamily subfamily IIA hydrolase, CECR5	HMMTigr	TIGR01456
352	54849	IPR006357	HAD-superfamily hydrolase, subfamily IIA	HMMTigr	TIGR01460
353	82669	IPR000182	GCN5-related N-acetyltransferase	HMMPfam	PF00583
354	50158	IPR011044	Quinoprotein amine dehydrogenase, beta chain-like	superfamily	SSF50969
355	65858	IPR001411	Tetracycline resistance protein TetB	FPrintScan	PR01036
355	65858	IPR001687	ATP/GTP-binding site motif A (P-loop)	ProfileScan	PS50101
355	65858	IPR003439	ABC transporter	ProfileScan	PS50100
355	65858	IPR004584	Recombination/repair protein Rad50	HMMTigr	TIGR00606
355	65858	IPR004638	Drug resistance transporter EmrB/QacA subfamily	HMMTigr	TIGR00711
355	65858	IPR007114	Major facilitator superfamily	ProfileScan	PS50850
356	79769	IPR001138	Fungal transcriptional regulatory protein, N-terminal	FPrintScan	PR00054
356	79769	IPR001138	Fungal transcriptional regulatory protein, N-terminal	HMMPfam	PF00172
356	79769	IPR001138	Fungal transcriptional regulatory protein, N-terminal	HMMSmart	SM00066
356	79769	IPR001138	Fungal transcriptional regulatory protein, N-terminal	ProfileScan	PS50048
356	79769	IPR002409	Aflatoxin biosynthesis regulatory protein	FPrintScan	PR00755
357	75009
358	70285	IPR005024	Snf7	HMMPfam	PF03357
359	35712	IPR003439	ABC transporter	ScanRegExp	PS00211
360	89153	IPR001138	Fungal transcriptional regulatory protein, N-terminal	HMMPfam	PF00172
360	89153	IPR001138	Fungal transcriptional regulatory protein, N-terminal	HMMSmart	SM00066
360	89153	IPR001138	Fungal transcriptional regulatory protein, N-terminal	ProfileScan	PS50048
360	89153	IPR001138	Fungal transcriptional regulatory protein, N-terminal	ScanRegExp	PS00463
360	89153	IPR007087	Zn-finger, C2H2 type	HMMPfam	PF00096
360	89153	IPR007087	Zn-finger, C2H2 type	ProfileScan	PS50157
361	98068
362	88782	IPR001138	Fungal transcriptional regulatory protein, N-terminal	HMMPfam	PF00172
362	88782	IPR001138	Fungal transcriptional regulatory protein, N-terminal	HMMSmart	SM00066
362	88782	IPR001138	Fungal transcriptional regulatory protein, N-terminal	ProfileScan	PS50048
362	88782	IPR001138	Fungal transcriptional regulatory protein, N-terminal	ScanRegExp	PS00463
362	88782	IPR007219	Fungal specific transcription factor	HMMPfam	PF04082
363	65962	IPR001757	ATPase, E1-E2 type	FPrintScan	PR00119
363	65962	IPR001757	ATPase, E1-E2 type	ScanRegExp	PS00154
363	65962	IPR004014	Cation transporting ATPase, N-terminal	HMMPfam	PF00690
363	65962	IPR005834	Haloacid dehalogenase-like hydrolase	HMMPfam	PF00702
363	65962	IPR006068	Cation transporting ATPase, C-terminal	HMMPfam	PF00689
363	65962	IPR006414	Potassium/sodium efflux P-type ATPase, fungal-type	HMMTigr	TIGR01523
363	65962	IPR008250	E1-E2 ATPase-associated region	HMMPfam	PF00122
364	35531	IPR000276	Rhodopsin-like GPCR superfamily	ScanRegExp	PS00237
365	43932	IPR003462	Ornithine cyclodeaminase/mu-crystallin	HMMPfam	PF02423
366	88607	IPR003034	DNA-binding SAP	ProfileScan	PS50800
366	88607	IPR004875	CENP-B protein	HMMPfam	PF03184
366	88607	IPR006600	Centromere protein B, DNA-binding region	HMMSmart	SM00674
367	90729
368	88163	IPR001138	Fungal transcriptional regulatory protein, N-terminal	FPrintScan	PR00054
368	88163	IPR001138	Fungal transcriptional regulatory protein, N-terminal	HMMPfam	PF00172
368	88163	IPR001138	Fungal transcriptional regulatory protein, N-terminal	HMMSmart	SM00066
368	88163	IPR001138	Fungal transcriptional regulatory protein, N-terminal	ProfileScan	PS50048
368	88163	IPR001138	Fungal transcriptional regulatory protein, N-terminal	ScanRegExp	PS00463
369	65828	IPR001128	Cytochrome P450	ScanRegExp	PS00086
369	65828	IPR001431	Insulinase-like	HMMPfam	PF00675
369	65828	IPR001431	Insulinase-like	ScanRegExp	PS00143
369	65828	IPR007863	Peptidase M16, C-terminal	HMMPfam	PF05193
370	98710	IPR001757	ATPase, E1-E2 type	FPrintScan	PR00119
370	98710	IPR001757	ATPase, E1-E2 type	ScanRegExp	PS00154
370	98710	IPR001917	Aminotransferase, class-II	ScanRegExp	PS00599
370	98710	IPR005834	Haloacid dehalogenase-like hydrolase	HMMPfam	PF00702
370	98710	IPR006068	Cation transporting ATPase, C-terminal	HMMPfam	PF00689
370	98710	IPR006069	Cation transporting ATPase	FPrintScan	PR00121
370	98710	IPR006408	Calcium-translocating P-type ATPase, PMCA-type	HMMTigr	TIGR01517
370	98710	IPR008250	E1-E2 ATPase-associated region	HMMPfam	PF00122
371	31433
372	74731	IPR000629	ATP-dependent helicase, DEAD-box	ScanRegExp	PS00039
372	74731	IPR001410	DEAD/DEAH box helicase	HMMSmart	SM00487
372	74731	IPR001410	DEAD/DEAH box helicase	ProfileScan	PS50136
372	74731	IPR001650	Helicase, C-terminal	HMMPfam	PF00271
372	74731	IPR001650	Helicase, C-terminal	HMMSmart	SM00490
372	74731	IPR011545	DEAD/DEAH box helicase, N-terminal	HMMPfam	PF00270
373	97068
374	31575
375	99940	NULL	NULL	ScanRegExp	PS00215
376	79956	IPR000719	Protein kinase	BlastProDom	PD000001
376	79956	IPR000719	Protein kinase	HMMPfam	PF00069
376	79956	IPR000719	Protein kinase	ProfileScan	PS50011
376	79956	IPR002290	Serine/threonine protein kinase	HMMSmart	SM00220
377	92298
378	78461
379	54423	IPR002198	Short-chain dehydrogenase/reductase SDR	FPrintScan	PR00080
379	54423	IPR002198	Short-chain dehydrogenase/reductase SDR	HMMPfam	PF00106
379	54423	IPR002347	Glucose/ribitol dehydrogenase	FPrintScan	PR00081
380	84965	IPR001461	Peptidase A1, pepsin	FPrintScan	PR00792
380	84965	IPR001461	Peptidase A1, pepsin	HMMPfam	PF00026
380	84965	IPR001969	Peptidase aspartic, active site	ScanRegExp	PS00141
381	54009	IPR003779	Carboxymuconolactone decarboxylase	HMMPfam	PF02627
382	51349
383	67033	IPR008551	Protein of unknown function DUF833	HMMPfam	PF05742
384	71093	IPR001373	Cullin	HMMPfam	PF00888
384	71093	IPR001373	Cullin	HMMSmart	SM00182
384	71093	IPR001373	Cullin	ProfileScan	PS50069
384	71093	IPR002114	HPr serine phosphorylation site	ScanRegExp	PS00589
385	58500	IPR002155	Thiolase	HMMPfam	PF00108
385	58500	IPR002155	Thiolase	HMMPfam	PF02803
385	58500	IPR002155	Thiolase	HMMTigr	TIGR01930
385	58500	IPR002155	Thiolase	ScanRegExp	PS00099
385	58500	IPR002155	Thiolase	ScanRegExp	PS00737
386	12083	IPR001138	Fungal transcriptional regulatory protein, N-terminal	FPrintScan	PR00054
386	12083	IPR001138	Fungal transcriptional regulatory protein, N-terminal	HMMPfam	PF00172
386	12083	IPR001138	Fungal transcriptional regulatory protein, N-terminal	HMMSmart	SM00066
386	12083	IPR001138	Fungal transcriptional regulatory protein, N-terminal	ProfileScan	PS50048
386	12083	IPR001138	Fungal transcriptional regulatory protein, N-terminal	ScanRegExp	PS00463
386	12083	IPR007219	Fungal specific transcription factor	HMMPfam	PF04082
387	122274	IPR001680	G-protein beta WD-40 repeat	BlastProDom	PD000018
387	122274	IPR001680	G-protein beta WD-40 repeat	FPrintScan	PR00320
387	122274	IPR001680	G-protein beta WD-40 repeat	HMMPfam	PF00400
387	122274	IPR001680	G-protein beta WD-40 repeat	HMMSmart	SM00320
387	122274	IPR001680	G-protein beta WD-40 repeat	ProfileScan	PS50082
387	122274	IPR001680	G-protein beta WD-40 repeat	ProfileScan	PS50294
387	122274	IPR001680	G-protein beta WD-40 repeat	ScanRegExp	PS00678
388	41535
389	37058	IPR000051	SAM (and some other nucleotide) binding motif	ProfileScan	PS50193
389	37058	IPR000794	Beta-ketoacyl synthase	HMMPfam	PF00109
389	37058	IPR000794	Beta-ketoacyl synthase	HMMPfam	PF02801
389	37058	IPR001227	Acyl transferase region	HMMPfam	PF00698
389	37058	IPR001601	Generic methyltransferase	ProfileScan	PS50124
389	37058	IPR002085	Zinc-containing alcohol dehydrogenase superfamily	HMMPfam	PF00107
390	87137	IPR000719	Protein kinase	BlastProDom	PD000001
390	87137	IPR000719	Protein kinase	HMMPfam	PF00069
390	87137	IPR000719	Protein kinase	ProfileScan	PS50011
390	87137	IPR001245	Tyrosine protein kinase	HMMSmart	SM00219
390	87137	IPR002290	Serine/threonine protein kinase	HMMSmart	SM00220
390	87137	IPR008271	Serine/threonine protein kinase, active site	ScanRegExp	PS00108
390	87137	IPR010730	Heterokaryon incompatibility	HMMPfam	PF06985
391	82144	IPR001138	Fungal transcriptional regulatory protein, N-terminal	FPrintScan	PR00054
391	82144	IPR001138	Fungal transcriptional regulatory protein, N-terminal	HMMPfam	PF00172
391	82144	IPR001138	Fungal transcriptional regulatory protein, N-terminal	HMMSmart	SM00066
391	82144	IPR001138	Fungal transcriptional regulatory protein, N-terminal	ProfileScan	PS50048
391	82144	IPR001138	Fungal transcriptional regulatory protein, N-terminal	ScanRegExp	PS00463
392	29731	IPR007219	Fungal specific transcription factor	HMMPfam	PF04082
393	102941	NULL	NULL	ScanRegExp	PS00215
394	87715	IPR001005	Myb, DNA-binding	ScanRegExp	PS00037
395	101778	IPR000794	Beta-ketoacyl synthase	HMMPfam	PF00109
395	101778	IPR000794	Beta-ketoacyl synthase	HMMPfam	PF02801
395	101778	IPR000794	Beta-ketoacyl synthase	ScanRegExp	PS00606
395	101778	IPR001227	Acyl transferase region	HMMPfam	PF00698
395	101778	IPR003231	Acyl carrier protein (ACP)	BlastProDom	PD000887
395	101778	IPR006162	Phosphopantetheine attachment site	ScanRegExp	PS00012
395	101778	IPR006163	Phosphopantetheine-binding	HMMPfam	PF00550
395	101778	IPR006163	Phosphopantetheine-binding	ProfileScan	PS50075
396	58928	IPR000209	Peptidase S8 and S53, subtilisin, kexin, sedolisin	FPrintScan	PR00723
396	58928	IPR000209	Peptidase S8 and S53, subtilisin, kexin, sedolisin	HMMPfam	PF00082
396	58928	IPR000209	Peptidase S8 and S53, subtilisin, kexin, sedolisin	ScanRegExp	PS00136
396	58928	IPR000209	Peptidase S8 and S53, subtilisin, kexin, sedolisin	ScanRegExp	PS00137
396	58928	IPR000209	Peptidase S8 and S53, subtilisin, kexin, sedolisin	ScanRegExp	PS00138
396	58928	IPR010259	Proteinase inhibitor I9, subtilisin propeptide	HMMPfam	PF05922
397	80870	IPR009360	Isy1-like splicing	HMMPfam	PF06246
398	17538	IPR002110	Ankyrin	FPrintScan	PR01415
398	17538	IPR011588	Glyoxalase/extradiol ring-cleavage dioxygenase	BlastProDom	PD002334
398	55706	IPR002110	Ankyrin	FPrintScan	PR01415
398	55706	IPR011588	Glyoxalase/extradiol ring-cleavage dioxygenase	BlastProDom	PD002334
399	34566	IPR002889	Carbohydrate-binding WSC	HMMPfam	PF01822
399	34566	IPR002889	Carbohydrate-binding WSC	HMMSmart	SM00321
400	102062	IPR003593	AAA ATPase	HMMSmart	SM00382
401	89203	NULL	NULL	ScanRegExp	PS00038
402	88680
403	80729
404	71963
405	34599	IPR002198	Short-chain dehydrogenase/reductase SDR	HMMPfam	PF00106
