# Supplementary material for: Proteomic Analysis of Fusarium solani Isolated from the Asian Longhorned Beetle, Anoplophora glabripennis
Source: PLoS One. 2012 Apr 9;7(4):e32990. doi: 10.1371/journal.pone.0032990 (PMC3322136; doi:10.1371/journal.pone.0032990)
Supplement: Table S5 — SignalP signal peptide prediction of proteins identified in MudPIT analysis. (XLS) [file pone.0032990.s005.xls]

## Sheet: Table S5
Table S5: KEGG EC Assignments
Protein Number	Necha 2.0 Accession Number	EC Number	Definition	Catalytic Activity	cofactors	Pathway	Pathway Class	Pathway Type
1	98804
2	39290	3.2.1.21	Beta-glucosidase.	Hydrolysis of terminal, non-reducing beta-D-glucose residues with release of beta-D-glucose.	--	Cyanoamino acid metabolism	Metabolism of Other Amino Acids	METABOLIC
2	39290	3.2.1.21	Beta-glucosidase.	Hydrolysis of terminal, non-reducing beta-D-glucose residues with release of beta-D-glucose.	--	Flavonoids, stilbene and lignin biosynthesis	Biosynthesis of Secondary Metabolites	METABOLIC
2	39290	3.2.1.21	Beta-glucosidase.	Hydrolysis of terminal, non-reducing beta-D-glucose residues with release of beta-D-glucose.	--	Starch and sucrose metabolism	Metabolism of Complex Carbohydrates	METABOLIC
4	70633	3.2.1.20	Alpha-glucosidase.	Hydrolysis of terminal, non-reducing 1,4-linked D-glucose residues with release of D-glucose.	--	Galactose metabolism	Carbohydrate Metabolism	METABOLIC
4	70633	3.2.1.20	Alpha-glucosidase.	Hydrolysis of terminal, non-reducing 1,4-linked D-glucose residues with release of D-glucose.	--	Starch and sucrose metabolism	Metabolism of Complex Carbohydrates	METABOLIC
5	106067
6	92513	3.2.1.3	Glucan 1,4-alpha-glucosidase.	Hydrolysis of terminal 1,4-linked alpha-D-glucose residues successively from non-reducing ends of the chains with release of beta-D-glucose.	--	Starch and sucrose metabolism	Metabolism of Complex Carbohydrates	METABOLIC
9	95359
10	63845	3.4.16.6	Carboxypeptidase D.	Preferential release of a C-terminal arginine or lysine residue.	--	--	--	--
11	89921	3.2.1.52	Beta-N-acetylhexosaminidase.	Hydrolysis of terminal non-reducing N-acetyl-D-hexosamine residues in N-acetyl-beta-D-hexosaminides.	--	Aminosugars metabolism	Metabolism of Complex Carbohydrates	METABOLIC
11	89921	3.2.1.52	Beta-N-acetylhexosaminidase.	Hydrolysis of terminal non-reducing N-acetyl-D-hexosamine residues in N-acetyl-beta-D-hexosaminides.	--	Globoside metabolism	Metabolism of Complex Lipids	METABOLIC
11	89921	3.2.1.52	Beta-N-acetylhexosaminidase.	Hydrolysis of terminal non-reducing N-acetyl-D-hexosamine residues in N-acetyl-beta-D-hexosaminides.	--	Glycosaminoglycan degradation	Metabolism of Complex Carbohydrates	METABOLIC
11	89921	3.2.1.52	Beta-N-acetylhexosaminidase.	Hydrolysis of terminal non-reducing N-acetyl-D-hexosamine residues in N-acetyl-beta-D-hexosaminides.	--	N-Glycan degradation	Metabolism of Complex Carbohydrates	METABOLIC
11	89921	3.2.1.52	Beta-N-acetylhexosaminidase.	Hydrolysis of terminal non-reducing N-acetyl-D-hexosamine residues in N-acetyl-beta-D-hexosaminides.	--	Sphingoglycolipid metabolism	Metabolism of Complex Lipids	METABOLIC
12	72498
13	66929	3.4.-.-	Acting on peptide bonds (peptide hydrolases).	--	--	Biotin metabolism	Metabolism of Cofactors and Vitamins	METABOLIC
13	66929	3.4.-.-	Acting on peptide bonds (peptide hydrolases).	--	--	Lysine degradation	Amino Acid Metabolism	METABOLIC
14	101753	3.4.23.1	Pepsin A.	Preferential cleavage: hydrophobic, preferably aromatic, residues in P1 and P1' positions. Cleaves 1-Phe-|-Val-2, 4-Gln-|-His-5, 13-Glu-|- Ala-14, 14-Ala-|-Leu-15, 15-Leu-|-Tyr-16, 16-Tyr-|-Leu-17, 23-Gly-|- Phe-24, 24-Phe-|-Phe-25 and 25-Phe-|-Tyr-26 bon	--	--	--	--
15	89124
16	28207	3.2.1.73	Licheninase.	Hydrolysis of 1,4-beta-D-glycosidic linkages in beta-D-glucans containing 1,3- and 1,4-bonds.	--	--	--	--
17	86938	3.4.21.-	Serine endopeptidases.	--	--	--	--	--
18	70723	3.1.3.2	Acid phosphatase.	An orthophosphoric monoester + H(2)O = an alcohol + phosphate.	--	gamma-Hexachlorocyclohexane degradation	Biodegradation of Xenobiotics	METABOLIC
18	70723	3.1.3.2	Acid phosphatase.	An orthophosphoric monoester + H(2)O = an alcohol + phosphate.	--	Riboflavin metabolism	Metabolism of Cofactors and Vitamins	METABOLIC
19	92290
20	73991
21	86582
22	97055	5.1.3.3	Aldose 1-epimerase.	Alpha-D-glucose = beta-D-glucose.	--	Glycolysis / Gluconeogenesis	Carbohydrate Metabolism	METABOLIC
23	55960
24	69103	3.4.23.24	Candidapepsin.	Preferential cleavage at the carboxyl of hydrophobic amino acids, but fails to cleave 15-Leu-|-Tyr-16, 16-Tyr-|-Leu-17 and 24-Phe-|-Phe-25 of insulin B chain. Activates trypsinogen, and degrades keratin.	--	--	--	--
25	70989	3.2.1.28	Alpha,alpha-trehalase.	Alpha,alpha-trehalose + H(2)O = 2 D-glucose.	--	Starch and sucrose metabolism	Metabolism of Complex Carbohydrates	METABOLIC
26	97581
27	98508
28	123372
29	104624
30	30050	3.1.1.1	Carboxylesterase.	A carboxylic ester + H(2)O = an alcohol + a carboxylic anion.	--	--	--	--
31	64790	3.4.16.6	Carboxypeptidase D.	Preferential release of a C-terminal arginine or lysine residue.	--	--	--	--
32	95979
33	52718	1.10.3.2	Laccase.	4 benzenediol + O(2) = 4 benzosemiquinone + 2 H(2)O.	Copper.	--	--	--
34	45063
35	53608
36	59218	2.2.1.2	Transaldolase.	Sedoheptulose 7-phosphate + D-glyceraldehyde 3-phosphate = D-erythrose 4-phosphate + D-fructose 6-phosphate.	--	Pentose phosphate pathway	Carbohydrate Metabolism	METABOLIC
37	66755
38	69590
39	24316
40	92861	1.11.1.6	Catalase.	2 H(2)O(2) = O(2) + 2 H(2)O.	Heme; Manganese.	Methane metabolism	Energy Metabolism	METABOLIC
40	92861	1.11.1.6	Catalase.	2 H(2)O(2) = O(2) + 2 H(2)O.	Heme; Manganese.	Tryptophan metabolism	Amino Acid Metabolism	METABOLIC
41	102898
42	45430
43	61473	3.4.21.48	Cerevisin.	Hydrolysis of proteins with broad specificity, and of BZ-Arg-OET > Ac-Tyr-OET. Does not hydrolyse peptide amides.	--	--	--	--
44	5675	3.2.1.58	Glucan 1,3-beta-glucosidase.	Successive hydrolysis of beta-D-glucose units from the non-reducing ends of 1,3-beta-D-glucans, releasing alpha-glucose.	--	Starch and sucrose metabolism	Metabolism of Complex Carbohydrates	METABOLIC
45	94437
46	40795	3.4.21.4	Trypsin.	Preferential cleavage: Arg-|-Xaa, Lys-|-Xaa.	--	--	--	--
47	59203	1.15.1.1	Superoxide dismutase.	2 peroxide radical + 2 H(+) = O(2) + H(2)O(2).	Copper and Zinc or Iron or Manganese.	--	--	--
48	87185
49	75440	3.4.21.-	Serine endopeptidases.	--	--	--	--	--
50	81573
51	105868
52	94623
53	42608
54	101134
55	87892
56	85035	3.2.1.21	Beta-glucosidase.	Hydrolysis of terminal, non-reducing beta-D-glucose residues with release of beta-D-glucose.	--	Cyanoamino acid metabolism	Metabolism of Other Amino Acids	METABOLIC
56	85035	3.2.1.21	Beta-glucosidase.	Hydrolysis of terminal, non-reducing beta-D-glucose residues with release of beta-D-glucose.	--	Flavonoids, stilbene and lignin biosynthesis	Biosynthesis of Secondary Metabolites	METABOLIC
56	85035	3.2.1.21	Beta-glucosidase.	Hydrolysis of terminal, non-reducing beta-D-glucose residues with release of beta-D-glucose.	--	Starch and sucrose metabolism	Metabolism of Complex Carbohydrates	METABOLIC
57	91612
58	77768	3.2.1.21	Beta-glucosidase.	Hydrolysis of terminal, non-reducing beta-D-glucose residues with release of beta-D-glucose.	--	Cyanoamino acid metabolism	Metabolism of Other Amino Acids	METABOLIC
58	77768	3.2.1.21	Beta-glucosidase.	Hydrolysis of terminal, non-reducing beta-D-glucose residues with release of beta-D-glucose.	--	Flavonoids, stilbene and lignin biosynthesis	Biosynthesis of Secondary Metabolites	METABOLIC
58	77768	3.2.1.21	Beta-glucosidase.	Hydrolysis of terminal, non-reducing beta-D-glucose residues with release of beta-D-glucose.	--	Starch and sucrose metabolism	Metabolism of Complex Carbohydrates	METABOLIC
59	122357
60	43451	3.4.16.5	Carboxypeptidase C.	Release of a C-terminal amino acid with a broad specificity.	--	--	--	--
61	101640
62	64352	3.4.17.-	Metallocarboxypeptidases.	--	--	--	--	--
63	97552	3.4.11.10	Bacterial leucyl aminopeptidase.	Release of an N-terminal amino acid, preferentially leucine, but not glutamic or aspartic acids.	Zinc.	--	--	--
64	45775	3.4.17.15	Carboxypeptidase A2.	Similar to that of carboxypeptidase A (EC 3.4.17.1), but with a preference for bulkier C-terminal residues.	Zinc.	--	--	--
65	45551	3.1.27.1	Ribonuclease T2.	Two-stage endonucleolytic cleavage to 3'-phosphomononucleotides and 3'-phosphooligonucleotides with 2',3'-cyclic phosphate intermediates.	--	--	--	--
66	61439	3.1.1.5	Lysophospholipase.	2-lysophosphatidylcholine + H(2)O = glycerophosphocholine + a fatty acid anion.	--	Phospholipid degradation	Metabolism of Complex Lipids	METABOLIC
68	31557	3.1.3.2	Acid phosphatase.	An orthophosphoric monoester + H(2)O = an alcohol + phosphate.	--	gamma-Hexachlorocyclohexane degradation	Biodegradation of Xenobiotics	METABOLIC
68	31557	3.1.3.2	Acid phosphatase.	An orthophosphoric monoester + H(2)O = an alcohol + phosphate.	--	Riboflavin metabolism	Metabolism of Cofactors and Vitamins	METABOLIC
69	66557
70	98938
71	66818
72	64597
73	81019
74	58149
75	51674	3.2.1.1	Alpha-amylase.	Endohydrolysis of 1,4-alpha-glucosidic linkages in oligosaccharides and polysaccharides.	--	Starch and sucrose metabolism	Metabolism of Complex Carbohydrates	METABOLIC
76	91822
77	90554	3.1.1.1	Carboxylesterase.	A carboxylic ester + H(2)O = an alcohol + a carboxylic anion.	--	--	--	--
78	73723
79	93118
80	106471
81	63567
82	56813	3.4.14.9	Tripeptidyl-peptidase I.	Release of an N-terminal tripeptide from a polypeptide.	--	--	--	--
83	93056	3.4.11.-	Aminopeptidases.	--	--	--	--	--
84	42039
85	82473	1.1.99.1	Choline dehydrogenase.	Choline + acceptor = betaine aldehyde + reduced acceptor.	PQQ.	Glycine, serine and threonine metabolism	Amino Acid Metabolism	METABOLIC
86	61287
87	66036	3.2.1.73	Licheninase.	Hydrolysis of 1,4-beta-D-glycosidic linkages in beta-D-glucans containing 1,3- and 1,4-bonds.	--	--	--	--
88	83495	3.4.11.-	Aminopeptidases.	--	--	--	--	--
89	106063
90	30822	3.4.17.21	Glutamate carboxypeptidase II.	Release of an unsubstituted, C-terminal glutamyl residue, typically from Ac-Asp-Glu or folylpoly-gamma-glutamates.	Zinc.	--	--	--
91	101071
92	75162	2.7.7.7	DNA-directed DNA polymerase.	N deoxynucleoside triphosphate = N diphosphate + {DNA}(N).	--	DNA polymerase	REPLICATION AND REPAIR	REGULATORY
92	75162	2.7.7.7	DNA-directed DNA polymerase.	N deoxynucleoside triphosphate = N diphosphate + {DNA}(N).	--	Purine metabolism	Nucleotide Metabolism	METABOLIC
92	75162	2.7.7.7	DNA-directed DNA polymerase.	N deoxynucleoside triphosphate = N diphosphate + {DNA}(N).	--	Pyrimidine metabolism	Nucleotide Metabolism	METABOLIC
93	105345
94	63211
95	51328	3.2.1.21	Beta-glucosidase.	Hydrolysis of terminal, non-reducing beta-D-glucose residues with release of beta-D-glucose.	--	Cyanoamino acid metabolism	Metabolism of Other Amino Acids	METABOLIC
95	51328	3.2.1.21	Beta-glucosidase.	Hydrolysis of terminal, non-reducing beta-D-glucose residues with release of beta-D-glucose.	--	Flavonoids, stilbene and lignin biosynthesis	Biosynthesis of Secondary Metabolites	METABOLIC
95	51328	3.2.1.21	Beta-glucosidase.	Hydrolysis of terminal, non-reducing beta-D-glucose residues with release of beta-D-glucose.	--	Starch and sucrose metabolism	Metabolism of Complex Carbohydrates	METABOLIC
96	52498
97	71712	3.1.3.1	Alkaline phosphatase.	An orthophosphoric monoester + H(2)O = an alcohol + phosphate.	Zinc; Magnesium.	Folate biosynthesis	Metabolism of Cofactors and Vitamins	METABOLIC
97	71712	3.1.3.1	Alkaline phosphatase.	An orthophosphoric monoester + H(2)O = an alcohol + phosphate.	Zinc; Magnesium.	gamma-Hexachlorocyclohexane degradation	Biodegradation of Xenobiotics	METABOLIC
97	71712	3.1.3.1	Alkaline phosphatase.	An orthophosphoric monoester + H(2)O = an alcohol + phosphate.	Zinc; Magnesium.	Glycerolipid metabolism	Metabolism of Complex Lipids	METABOLIC
98	77788
99	94265
100	96628	2.3.2.2	Gamma-glutamyltransferase.	(5-L-glutamyl)-peptide + an amino acid = peptide + 5-L-glutamyl-amino acid.	--	Cyanoamino acid metabolism	Metabolism of Other Amino Acids	METABOLIC
100	96628	2.3.2.2	Gamma-glutamyltransferase.	(5-L-glutamyl)-peptide + an amino acid = peptide + 5-L-glutamyl-amino acid.	--	Glutathione metabolism	Metabolism of Other Amino Acids	METABOLIC
100	96628	2.3.2.2	Gamma-glutamyltransferase.	(5-L-glutamyl)-peptide + an amino acid = peptide + 5-L-glutamyl-amino acid.	--	Prostaglandin and leukotriene metabolism	Metabolism of Complex Lipids	METABOLIC
100	96628	2.3.2.2	Gamma-glutamyltransferase.	(5-L-glutamyl)-peptide + an amino acid = peptide + 5-L-glutamyl-amino acid.	--	Selenoamino acid metabolism	Metabolism of Other Amino Acids	METABOLIC
100	96628	2.3.2.2	Gamma-glutamyltransferase.	(5-L-glutamyl)-peptide + an amino acid = peptide + 5-L-glutamyl-amino acid.	--	Taurine and hypotaurine metabolism	Metabolism of Other Amino Acids	METABOLIC
101	98600	3.6.3.6	Proton-exporting ATPase.	ATP + H(2)O + H(+)(In) = ADP + phosphate + H(+)(Out).	Magnesium.	Oxidative phosphorylation	Energy Metabolism	METABOLIC
102	81095	3.4.23.-	Aspartic endopeptidases.	--	--	--	--	--
103	90966
104	19302
105	97545
106	74826	1.15.1.1	Superoxide dismutase.	2 peroxide radical + 2 H(+) = O(2) + H(2)O(2).	Copper and Zinc or Iron or Manganese.	--	--	--
107	103025
108	96610
109	122999
110	45731
111	61302
112	90684
113	3212	3.2.1.14	Chitinase.	Hydrolysis of the 1,4-beta-linkages of N-acetyl-D-glucosamine polymers of chitin.	--	Aminosugars metabolism	Metabolism of Complex Carbohydrates	METABOLIC
114	60561	1.11.1.6	Catalase.	2 H(2)O(2) = O(2) + 2 H(2)O.	Heme; Manganese.	Methane metabolism	Energy Metabolism	METABOLIC
114	60561	1.11.1.6	Catalase.	2 H(2)O(2) = O(2) + 2 H(2)O.	Heme; Manganese.	Tryptophan metabolism	Amino Acid Metabolism	METABOLIC
115	98804
116	97410
117	93193	3.4.14.-	Dipeptidyl-peptidases and tripeptidyl-peptidases.	--	--	--	--	--
118	60585	3.4.11.-	Aminopeptidases.	--	--	--	--	--
119	87546
120	83307
121	66588
122	95104
123	50101	1.10.3.2	Laccase.	4 benzenediol + O(2) = 4 benzosemiquinone + 2 H(2)O.	Copper.	--	--	--
124	101489	1.1.99.1	Choline dehydrogenase.	Choline + acceptor = betaine aldehyde + reduced acceptor.	PQQ.	Glycine, serine and threonine metabolism	Amino Acid Metabolism	METABOLIC
125	98794
126	59065
126	68927
126	9901
127	58598
128	104927
129	49364	3.1.1.3	Triacylglycerol lipase.	Triacylglycerol + H(2)O = diacylglycerol + a fatty acid anion.	--	Glycerolipid metabolism	Metabolism of Complex Lipids	METABOLIC
130	36093
131	52284	3.4.21.48	Cerevisin.	Hydrolysis of proteins with broad specificity, and of BZ-Arg-OET > Ac-Tyr-OET. Does not hydrolyse peptide amides.	--	--	--	--
132	65752
133	77500	3.6.3.6	Proton-exporting ATPase.	ATP + H(2)O + H(+)(In) = ADP + phosphate + H(+)(Out).	Magnesium.	Oxidative phosphorylation	Energy Metabolism	METABOLIC
134	122597
135	41379	3.1.3.2	Acid phosphatase.	An orthophosphoric monoester + H(2)O = an alcohol + phosphate.	--	gamma-Hexachlorocyclohexane degradation	Biodegradation of Xenobiotics	METABOLIC
135	41379	3.1.3.2	Acid phosphatase.	An orthophosphoric monoester + H(2)O = an alcohol + phosphate.	--	Riboflavin metabolism	Metabolism of Cofactors and Vitamins	METABOLIC
136	79651
137	66813
138	52943
139	74129
140	102066
141	99505
142	82281
143	98847
144	72854
145	106153
145	34530
146	106439
147	103374	3.2.1.3	Glucan 1,4-alpha-glucosidase.	Hydrolysis of terminal 1,4-linked alpha-D-glucose residues successively from non-reducing ends of the chains with release of beta-D-glucose.	--	Starch and sucrose metabolism	Metabolism of Complex Carbohydrates	METABOLIC
148	101401
149	85563	3.2.1.21	Beta-glucosidase.	Hydrolysis of terminal, non-reducing beta-D-glucose residues with release of beta-D-glucose.	--	Cyanoamino acid metabolism	Metabolism of Other Amino Acids	METABOLIC
149	85563	3.2.1.21	Beta-glucosidase.	Hydrolysis of terminal, non-reducing beta-D-glucose residues with release of beta-D-glucose.	--	Flavonoids, stilbene and lignin biosynthesis	Biosynthesis of Secondary Metabolites	METABOLIC
149	85563	3.2.1.21	Beta-glucosidase.	Hydrolysis of terminal, non-reducing beta-D-glucose residues with release of beta-D-glucose.	--	Starch and sucrose metabolism	Metabolism of Complex Carbohydrates	METABOLIC
150	84951	6.3.2.-	Acid--D-amino-acid ligases (peptide synthases).	--	--	Tryptophan metabolism	Amino Acid Metabolism	METABOLIC
150	84951	6.3.2.-	Acid--D-amino-acid ligases (peptide synthases).	--	--	Ubiquinone biosynthesis	Metabolism of Cofactors and Vitamins	METABOLIC
151	44289
152	100110	3.4.16.5	Carboxypeptidase C.	Release of a C-terminal amino acid with a broad specificity.	--	--	--	--
153	49778
154	80719	1.10.3.2	Laccase.	4 benzenediol + O(2) = 4 benzosemiquinone + 2 H(2)O.	Copper.	--	--	--
155	34931	2.7.1.137	1-phosphatidylinositol 3-kinase.	ATP + 1-phosphatidyl-1D-myo-inositol = ADP + 1-phosphatidyl-1D-myo- inositol 3-phosphate.	--	Inositol phosphate metabolism	Metabolism of Complex Lipids	METABOLIC
156	47861
157	57678
158	80249
159	91463
160	83807
161	35947	2.3.1.48	Histone acetyltransferase.	Acetyl-CoA + histone = CoA + acetyl-histone.	--	--	--	--
162	101368
163	106448
164	79968
165	85037
166	84858	2.7.1.37	Protein kinase.	ATP + a protein = ADP + a phosphoprotein.	--	--	--	--
167	102357
167	56730
168	54179
169	68447
170	52396
171	86428
172	101480
173	39598
174	100421	3.6.1.3	Adenosinetriphosphatase.	ATP + H(2)O = ADP + phosphate.	--	Purine metabolism	Nucleotide Metabolism	METABOLIC
175	78592	3.6.1.-	In phosphorous-containing anhydrides.	--	--	Folate biosynthesis	Metabolism of Cofactors and Vitamins	METABOLIC
175	78592	3.6.1.-	In phosphorous-containing anhydrides.	--	--	Starch and sucrose metabolism	Metabolism of Complex Carbohydrates	METABOLIC
176	78887
177	82282
178	23911
179	92903
180	75054
180	93290	2.3.2.8	Arginyltransferase.	L-arginyl-tRNA + protein = tRNA + L-arginyl-protein.	--	--	--	--
181	30723	3.6.1.3	Adenosinetriphosphatase.	ATP + H(2)O = ADP + phosphate.	--	Purine metabolism	Nucleotide Metabolism	METABOLIC
182	80347	3.1.4.4	Phospholipase D.	A phosphatidylcholine + H(2)O = choline + a phosphatidate.	--	Glycerolipid metabolism	Metabolism of Complex Lipids	METABOLIC
182	80347	3.1.4.4	Phospholipase D.	A phosphatidylcholine + H(2)O = choline + a phosphatidate.	--	Phospholipid degradation	Metabolism of Complex Lipids	METABOLIC
183	63972
184	95941
185	92827
186	31909	1.1.2.3	L-lactate dehydrogenase (cytochrome).	(S)-lactate + 2 ferricytochrome c = pyruvate + 2 ferrocytochrome c.	FMN; Protoheme IX.	Pyruvate metabolism	Carbohydrate Metabolism	METABOLIC
187	30853	6.5.1.1	DNA ligase (ATP).	ATP + {deoxyribonucleotide}(N) + {deoxyribonucleotide}(M) = AMP + diphosphate + {deoxyribonucleotide}(N+M).	--	--	--	--
188	37893
189	87950	3.2.1.21	Beta-glucosidase.	Hydrolysis of terminal, non-reducing beta-D-glucose residues with release of beta-D-glucose.	--	Cyanoamino acid metabolism	Metabolism of Other Amino Acids	METABOLIC
189	87950	3.2.1.21	Beta-glucosidase.	Hydrolysis of terminal, non-reducing beta-D-glucose residues with release of beta-D-glucose.	--	Flavonoids, stilbene and lignin biosynthesis	Biosynthesis of Secondary Metabolites	METABOLIC
189	87950	3.2.1.21	Beta-glucosidase.	Hydrolysis of terminal, non-reducing beta-D-glucose residues with release of beta-D-glucose.	--	Starch and sucrose metabolism	Metabolism of Complex Carbohydrates	METABOLIC
190	28766
191	80786
192	58915
193	30596
194	84853
195	63858
196	58345	3.6.4.2	Dynein ATPase.	ATP + H(2)O = ADP + phosphate.	--	--	--	--
197	32130	3.6.4.1	Myosin ATPase.	ATP + H(2)O = ADP + phosphate.	--	Purine metabolism	Nucleotide Metabolism	METABOLIC
198	98643
199	68433
200	97337
201	74762
202	47830
203	41818	2.7.1.-	Phosphotransferases with an alcohol group as acceptor.	--	--	Benzoate degradation via CoA ligation	Biodegradation of Xenobiotics	METABOLIC
203	41818	2.7.1.-	Phosphotransferases with an alcohol group as acceptor.	--	--	Inositol phosphate metabolism	Metabolism of Complex Lipids	METABOLIC
203	41818	2.7.1.-	Phosphotransferases with an alcohol group as acceptor.	--	--	Nicotinate and nicotinamide metabolism	Metabolism of Cofactors and Vitamins	METABOLIC
203	41818	2.7.1.-	Phosphotransferases with an alcohol group as acceptor.	--	--	Sphingoglycolipid metabolism	Metabolism of Complex Lipids	METABOLIC
203	41818	2.7.1.-	Phosphotransferases with an alcohol group as acceptor.	--	--	Starch and sucrose metabolism	Metabolism of Complex Carbohydrates	METABOLIC
204	87247
205	38713
206	75637
207	48646
208	72599
209	95449	2.7.7.6	DNA-directed RNA polymerase.	N nucleoside triphosphate = N diphosphate + {RNA}(N).	--	Purine metabolism	Nucleotide Metabolism	METABOLIC
209	95449	2.7.7.6	DNA-directed RNA polymerase.	N nucleoside triphosphate = N diphosphate + {RNA}(N).	--	Pyrimidine metabolism	Nucleotide Metabolism	METABOLIC
209	95449	2.7.7.6	DNA-directed RNA polymerase.	N nucleoside triphosphate = N diphosphate + {RNA}(N).	--	RNA polymerase	TRANSCRIPTION	REGULATORY
210	82261
211	49847
212	46277	3.5.1.49	Formamidase.	Formamide + H(2)O = formate + NH(3).	--	Glyoxylate and dicarboxylate metabolism	Carbohydrate Metabolism	METABOLIC
212	46277	3.5.1.49	Formamidase.	Formamide + H(2)O = formate + NH(3).	--	Nitrogen metabolism	Energy Metabolism	METABOLIC
212	46277	3.5.1.49	Formamidase.	Formamide + H(2)O = formate + NH(3).	--	Tryptophan metabolism	Amino Acid Metabolism	METABOLIC
213	101260
214	38285	3.6.1.3	Adenosinetriphosphatase.	ATP + H(2)O = ADP + phosphate.	--	Purine metabolism	Nucleotide Metabolism	METABOLIC
215	64318
216	44741
217	75273
218	72074
219	35620
220	35658
221	81544	3.4.14.9	Tripeptidyl-peptidase I.	Release of an N-terminal tripeptide from a polypeptide.	--	--	--	--
222	54810	2.4.1.173	Sterol glucosyltransferase.	UDP-glucose + a sterol = UDP + an O-glucosylsterol.	--	--	--	--
223	86789
224	77058
225	75777
226	59700
227	85894	1.5.1.12	1-pyrroline-5-carboxylate dehydrogenase.	1-pyrroline-5-carboxylate + NAD(+) + H(2)O = L-glutamate + NADH.	--	Arginine and proline metabolism	Amino Acid Metabolism	METABOLIC
227	85894	1.5.1.12	1-pyrroline-5-carboxylate dehydrogenase.	1-pyrroline-5-carboxylate + NAD(+) + H(2)O = L-glutamate + NADH.	--	Glutamate metabolism	Amino Acid Metabolism	METABOLIC
228	68433
229	25809
230	63514
231	39784
232	81588	3.2.1.18	Exo-alpha-sialidase.	Hydrolysis of alpha-(2->3)-, alpha-(2->6)-, alpha-(2->8)-glycosidic linkages of terminal sialic residues in oligosaccharides, glycoproteins, glycolipids, colominic acid and synthetic substrates.	--	N-Glycan degradation	Metabolism of Complex Carbohydrates	METABOLIC
232	81588	3.2.1.18	Exo-alpha-sialidase.	Hydrolysis of alpha-(2->3)-, alpha-(2->6)-, alpha-(2->8)-glycosidic linkages of terminal sialic residues in oligosaccharides, glycoproteins, glycolipids, colominic acid and synthetic substrates.	--	Sphingoglycolipid metabolism	Metabolism of Complex Lipids	METABOLIC
233	41038
234	92554
235	74696	3.1.4.12	Sphingomyelin phosphodiesterase.	Sphingomyelin + H(2)O = N-acylsphingosine + choline phosphate.	--	Sphingophospholipid biosynthesis	Metabolism of Complex Lipids	METABOLIC
236	99711
237	122449	3.2.1.58	Glucan 1,3-beta-glucosidase.	Successive hydrolysis of beta-D-glucose units from the non-reducing ends of 1,3-beta-D-glucans, releasing alpha-glucose.	--	Starch and sucrose metabolism	Metabolism of Complex Carbohydrates	METABOLIC
238	123202
239	44201	6.1.1.18	Glutamine--tRNA ligase.	ATP + L-glutamine + tRNA(Gln) = AMP + diphosphate + L-glutaminyl- tRNA(Gln).	--	Aminoacyl-tRNA biosynthesis	TRANSLATION	REGULATORY
239	44201	6.1.1.18	Glutamine--tRNA ligase.	ATP + L-glutamine + tRNA(Gln) = AMP + diphosphate + L-glutaminyl- tRNA(Gln).	--	Glutamate metabolism	Amino Acid Metabolism	METABOLIC
240	89599
241	78627
242	89813
243	103636
244	83479
245	79260
246	85342
247	53445
248	72534	1.15.1.1	Superoxide dismutase.	2 peroxide radical + 2 H(+) = O(2) + H(2)O(2).	Copper and Zinc or Iron or Manganese.	--	--	--
249	65446
250	58007
251	93451
252	90422	4.1.99.3	Deoxyribodipyrimidine photolyase.	Cyclobutadipyrimidine (in DNA) = 2 pyrimidine residues (in DNA).	Reduced flavin; Pterin or F420.	--	--	--
253	60055
254	123279	3.2.1.21	Beta-glucosidase.	Hydrolysis of terminal, non-reducing beta-D-glucose residues with release of beta-D-glucose.	--	Cyanoamino acid metabolism	Metabolism of Other Amino Acids	METABOLIC
254	123279	3.2.1.21	Beta-glucosidase.	Hydrolysis of terminal, non-reducing beta-D-glucose residues with release of beta-D-glucose.	--	Flavonoids, stilbene and lignin biosynthesis	Biosynthesis of Secondary Metabolites	METABOLIC
254	123279	3.2.1.21	Beta-glucosidase.	Hydrolysis of terminal, non-reducing beta-D-glucose residues with release of beta-D-glucose.	--	Starch and sucrose metabolism	Metabolism of Complex Carbohydrates	METABOLIC
255	59877	1.2.1.12	Glyceraldehyde 3-phosphate dehydrogenase (phosphorylating).	D-glyceraldehyde 3-phosphate + phosphate + NAD(+) = 3-phospho-D- glyceroyl phosphate + NADH.	--	D-Arginine and D-ornithine metabolism	Metabolism of Other Amino Acids	METABOLIC
255	59877	1.2.1.12	Glyceraldehyde 3-phosphate dehydrogenase (phosphorylating).	D-glyceraldehyde 3-phosphate + phosphate + NAD(+) = 3-phospho-D- glyceroyl phosphate + NADH.	--	Glycolysis / Gluconeogenesis	Carbohydrate Metabolism	METABOLIC
256	52779	3.4.11.-	Aminopeptidases.	--	--	--	--	--
257	65042
258	99942	3.1.3.48	Protein-tyrosine-phosphatase.	Protein tyrosine phosphate + H(2)O = protein tyrosine + phosphate.	--	--	--	--
259	88405
260	36693
261	70605	1.10.3.3	L-ascorbate oxidase.	2 L-ascorbate + O(2) = 2 dehydroascorbate + 2 H(2)O.	Copper.	Ascorbate and aldarate metabolism	Carbohydrate Metabolism	METABOLIC
262	51324
263	106525
264	102125
265	46452
266	98018	3.4.17.2	Carboxypeptidase B.	Peptidyl-L-Lysine(or L-arginine) + H(2)O = peptide + L-lysine(or L- arginine).	Zinc.	--	--	--
267	96429	3.1.3.2	Acid phosphatase.	An orthophosphoric monoester + H(2)O = an alcohol + phosphate.	--	gamma-Hexachlorocyclohexane degradation	Biodegradation of Xenobiotics	METABOLIC
267	96429	3.1.3.2	Acid phosphatase.	An orthophosphoric monoester + H(2)O = an alcohol + phosphate.	--	Riboflavin metabolism	Metabolism of Cofactors and Vitamins	METABOLIC
268	95877
269	42631	3.1.1.-	Carboxylic ester hydrolases.	--	--	2,4-Dichlorobenzoate degradation	Biodegradation of Xenobiotics	METABOLIC
269	42631	3.1.1.-	Carboxylic ester hydrolases.	--	--	Butanoate metabolism	Carbohydrate Metabolism	METABOLIC
269	42631	3.1.1.-	Carboxylic ester hydrolases.	--	--	Pentose and glucuronate interconversions	Carbohydrate Metabolism	METABOLIC
270	3047	1.14.-.-	Acting on paired donors, with incorporation or reduction of	--	--	Ascorbate and aldarate metabolism	Carbohydrate Metabolism	METABOLIC
270	3047	1.14.-.-	Acting on paired donors, with incorporation or reduction of	--	--	Flavonoids, stilbene and lignin biosynthesis	Biosynthesis of Secondary Metabolites	METABOLIC
270	3047	1.14.-.-	Acting on paired donors, with incorporation or reduction of	--	--	Fluorene degradation	Biodegradation of Xenobiotics	METABOLIC
270	3047	1.14.-.-	Acting on paired donors, with incorporation or reduction of	--	--	gamma-Hexachlorocyclohexane degradation	Biodegradation of Xenobiotics	METABOLIC
271	59628	2.7.1.30	Glycerol kinase.	ATP + glycerol = ADP + glycerol 3-phosphate.	--	Glycerolipid metabolism	Metabolism of Complex Lipids	METABOLIC
272	77168
273	105804
274	85379
275	99507
276	59329
277	51284	3.4.21.-	Serine endopeptidases.	--	--	--	--	--
278	122630
279	102394	2.4.2.7	Adenine phosphoribosyltransferase.	AMP + diphosphate = adenine + 5-phospho-alpha-D-ribose 1-diphosphate.	--	Purine metabolism	Nucleotide Metabolism	METABOLIC
280	100823	1.1.1.-	With NAD(+) or NADP(+) as acceptor.	--	--	Ascorbate and aldarate metabolism	Carbohydrate Metabolism	METABOLIC
280	100823	1.1.1.-	With NAD(+) or NADP(+) as acceptor.	--	--	Benzoate degradation via CoA ligation	Biodegradation of Xenobiotics	METABOLIC
280	100823	1.1.1.-	With NAD(+) or NADP(+) as acceptor.	--	--	Bile acid biosynthesis	Lipid Metabolism	METABOLIC
280	100823	1.1.1.-	With NAD(+) or NADP(+) as acceptor.	--	--	Butanoate metabolism	Carbohydrate Metabolism	METABOLIC
280	100823	1.1.1.-	With NAD(+) or NADP(+) as acceptor.	--	--	Fructose and mannose metabolism	Carbohydrate Metabolism	METABOLIC
280	100823	1.1.1.-	With NAD(+) or NADP(+) as acceptor.	--	--	Galactose metabolism	Carbohydrate Metabolism	METABOLIC
280	100823	1.1.1.-	With NAD(+) or NADP(+) as acceptor.	--	--	Glycerolipid metabolism	Metabolism of Complex Lipids	METABOLIC
280	100823	1.1.1.-	With NAD(+) or NADP(+) as acceptor.	--	--	Glycine, serine and threonine metabolism	Amino Acid Metabolism	METABOLIC
280	100823	1.1.1.-	With NAD(+) or NADP(+) as acceptor.	--	--	Lysine degradation	Amino Acid Metabolism	METABOLIC
280	100823	1.1.1.-	With NAD(+) or NADP(+) as acceptor.	--	--	Nucleotide sugars metabolism	Nucleotide Metabolism	METABOLIC
280	100823	1.1.1.-	With NAD(+) or NADP(+) as acceptor.	--	--	Tetrachloroethene degradation	Biodegradation of Xenobiotics	METABOLIC
280	100823	1.1.1.-	With NAD(+) or NADP(+) as acceptor.	--	--	Vitamin B6 metabolism	Metabolism of Cofactors and Vitamins	METABOLIC
282	85139
283	46646
284	103119
285	98192
286	93370
287	91549
288	82946
289	64426
290	53490
291	46803
291	47719
292	41392
293	106136
294	102651
295	102374
296	101622	1.9.3.1	Cytochrome-c oxidase.	4 ferrocytochrome c + O(2) = 4 ferricytochrome c + 2 H(2)O.	Copper.	Oxidative phosphorylation	Energy Metabolism	METABOLIC
297	100964
298	99057
299	90065
300	99954
301	88472
302	88729
303	40882
304	83163
305	95029
306	76476
307	44083
308	87590	3.2.1.18	Exo-alpha-sialidase.	Hydrolysis of alpha-(2->3)-, alpha-(2->6)-, alpha-(2->8)-glycosidic linkages of terminal sialic residues in oligosaccharides, glycoproteins, glycolipids, colominic acid and synthetic substrates.	--	N-Glycan degradation	Metabolism of Complex Carbohydrates	METABOLIC
308	87590	3.2.1.18	Exo-alpha-sialidase.	Hydrolysis of alpha-(2->3)-, alpha-(2->6)-, alpha-(2->8)-glycosidic linkages of terminal sialic residues in oligosaccharides, glycoproteins, glycolipids, colominic acid and synthetic substrates.	--	Sphingoglycolipid metabolism	Metabolism of Complex Lipids	METABOLIC
309	99752
310	46230	2.3.1.85	Fatty-acid synthase.	Acetyl-CoA + N malonyl-CoA + 2N NADPH = a long-chain fatty acid + (N+1) CoA + N CO(2) + 2N NADP(+).	--	Fatty acid biosynthesis (path 1)	Lipid Metabolism	METABOLIC
311	50386
312	32128
313	73925
314	92970	2.3.1.48	Histone acetyltransferase.	Acetyl-CoA + histone = CoA + acetyl-histone.	--	--	--	--
315	57694
316	64056
317	88716
318	63014	2.4.1.18	1,4-alpha-glucan branching enzyme.	Formation of 1,6-glucosidic linkages of glycogen.	--	Starch and sucrose metabolism	Metabolism of Complex Carbohydrates	METABOLIC
319	96752	6.1.1.12	Aspartate--tRNA ligase.	ATP + L-aspartate + tRNA(Asp) = AMP + diphosphate + L-aspartyl- tRNA(Asp).	--	Alanine and aspartate metabolism	Amino Acid Metabolism	METABOLIC
319	96752	6.1.1.12	Aspartate--tRNA ligase.	ATP + L-aspartate + tRNA(Asp) = AMP + diphosphate + L-aspartyl- tRNA(Asp).	--	Aminoacyl-tRNA biosynthesis	TRANSLATION	REGULATORY
320	43049
321	96414	6.1.1.10	Methionine--tRNA ligase.	ATP + L-methionine + tRNA(Met) = AMP + diphosphate + L-methionyl- tRNA(Met).	--	Aminoacyl-tRNA biosynthesis	TRANSLATION	REGULATORY
321	96414	6.1.1.10	Methionine--tRNA ligase.	ATP + L-methionine + tRNA(Met) = AMP + diphosphate + L-methionyl- tRNA(Met).	--	Methionine metabolism	Amino Acid Metabolism	METABOLIC
321	96414	6.1.1.10	Methionine--tRNA ligase.	ATP + L-methionine + tRNA(Met) = AMP + diphosphate + L-methionyl- tRNA(Met).	--	Selenoamino acid metabolism	Metabolism of Other Amino Acids	METABOLIC
322	77405
323	53688	3.2.1.23	Beta-galactosidase.	Hydrolysis of terminal, non-reducing beta-D-galactose residues in beta-D-galactosides.	--	Galactose metabolism	Carbohydrate Metabolism	METABOLIC
323	53688	3.2.1.23	Beta-galactosidase.	Hydrolysis of terminal, non-reducing beta-D-galactose residues in beta-D-galactosides.	--	Glycerolipid metabolism	Metabolism of Complex Lipids	METABOLIC
323	53688	3.2.1.23	Beta-galactosidase.	Hydrolysis of terminal, non-reducing beta-D-galactose residues in beta-D-galactosides.	--	Glycosaminoglycan degradation	Metabolism of Complex Carbohydrates	METABOLIC
323	53688	3.2.1.23	Beta-galactosidase.	Hydrolysis of terminal, non-reducing beta-D-galactose residues in beta-D-galactosides.	--	N-Glycan degradation	Metabolism of Complex Carbohydrates	METABOLIC
323	53688	3.2.1.23	Beta-galactosidase.	Hydrolysis of terminal, non-reducing beta-D-galactose residues in beta-D-galactosides.	--	Sphingoglycolipid metabolism	Metabolism of Complex Lipids	METABOLIC
324	34430
325	24864
326	123164
327	102366
328	44809
329	60582
330	68215
331	94350	3.6.3.8	Calcium-transporting ATPase.	ATP + H(2)O + Ca(2+)(Cis) = ADP + phosphate + Ca(2+)(Trans).	Magnesium.	--	--	--
332	37567
333	75701
334	61141
335	102170
336	89214
337	48646
338	106409
339	75789
340	78838	2.7.3.-	Phosphotransferases with a nitrogenous group as acceptor.	--	--	Type II secretion system	SORTING AND DEGRADATION	REGULATORY
341	100177
342	91987
343	100890
344	94298
345	48101	1.14.13.22	Cyclohexanone monooxygenase.	Cyclohexanone + NADPH + O(2) = 6-hexanolide + NADP(+) + H(2)O.	FAD.	Caprolactam degradation	Biodegradation of Xenobiotics	METABOLIC
346	37937
347	45738
348	30581	1.1.1.205	IMP dehydrogenase.	Inosine 5'-phosphate + NAD(+) + H(2)O = xanthosine 5'-phosphate + NADH.	--	Purine metabolism	Nucleotide Metabolism	METABOLIC
349	96028	1.8.3.1	Sulfite oxidase.	Sulfite + O(2) + H(2)O = sulfate + H(2)O(2).	Heme; Molybdenum.	Sulfur metabolism	Energy Metabolism	METABOLIC
350	75256
351	88187	1.1.1.101	Acylglycerone-phosphate reductase.	1-palmitoylglycerol 3-phosphate + NADP(+) = palmitoylglycerone phosphate + NADPH.	--	--	--	--
352	54849
353	82669
354	50158
355	65858	3.6.-.-	Acting on acid anhydrides.	--	--	--	--	--
356	79769
357	75009
358	70285
359	35712	3.1.13.-	Exoribonucleases producing 5'-phosphomonoesters.	--	--	--	--	--
360	89153
361	98068
362	88782
363	65962	3.6.3.8	Calcium-transporting ATPase.	ATP + H(2)O + Ca(2+)(Cis) = ADP + phosphate + Ca(2+)(Trans).	Magnesium.	--	--	--
364	35531
365	43932	4.3.1.12	Ornithine cyclodeaminase.	L-ornithine = L-proline + NH(3).	NAD.	Arginine and proline metabolism	Amino Acid Metabolism	METABOLIC
366	88607
367	90729
368	88163
369	65828	3.4.24.64	Mitochondrial processing peptidase.	Release of N-terminal transit peptides from precursor proteins imported into the mitochondrion, typically with Arg in position P2.	Zinc.	--	--	--
370	98710	3.6.3.8	Calcium-transporting ATPase.	ATP + H(2)O + Ca(2+)(Cis) = ADP + phosphate + Ca(2+)(Trans).	Magnesium.	--	--	--
371	31433
372	74731	3.6.1.3	Adenosinetriphosphatase.	ATP + H(2)O = ADP + phosphate.	--	Purine metabolism	Nucleotide Metabolism	METABOLIC
373	97068
374	31575
375	99940
376	79956
377	92298
378	78461
379	54423	1.1.1.100	3-oxoacyl-[acyl-carrier protein] reductase.	(3R)-3-hydroxyacyl-[acyl-carrier protein] + NADP(+) = 3-oxoacyl- [acyl-carrier protein] + NADPH.	--	Fatty acid biosynthesis (path 1)	Lipid Metabolism	METABOLIC
380	84965	3.4.23.-	Aspartic endopeptidases.	--	--	--	--	--
381	54009
382	51349
383	67033
384	71093
385	58500	2.3.1.16	Acetyl-CoA C-acyltransferase.	Acyl-CoA + acetyl-CoA = CoA + 3-oxoacyl-CoA.	--	Benzoate degradation via hydroxylation	Biodegradation of Xenobiotics	METABOLIC
385	58500	2.3.1.16	Acetyl-CoA C-acyltransferase.	Acyl-CoA + acetyl-CoA = CoA + 3-oxoacyl-CoA.	--	Bile acid biosynthesis	Lipid Metabolism	METABOLIC
385	58500	2.3.1.16	Acetyl-CoA C-acyltransferase.	Acyl-CoA + acetyl-CoA = CoA + 3-oxoacyl-CoA.	--	Fatty acid biosynthesis (path 2)	Lipid Metabolism	METABOLIC
385	58500	2.3.1.16	Acetyl-CoA C-acyltransferase.	Acyl-CoA + acetyl-CoA = CoA + 3-oxoacyl-CoA.	--	Fatty acid metabolism	Lipid Metabolism	METABOLIC
385	58500	2.3.1.16	Acetyl-CoA C-acyltransferase.	Acyl-CoA + acetyl-CoA = CoA + 3-oxoacyl-CoA.	--	Valine, leucine and isoleucine degradation	Amino Acid Metabolism	METABOLIC
386	12083
387	122274
388	41535
389	37058
390	87137
391	82144
392	29731
393	102941
394	87715
395	101778
396	58928	3.4.21.-	Serine endopeptidases.	--	--	--	--	--
397	80870
398	17538
398	55706
399	34566
400	102062
401	89203
402	88680
403	80729
404	71963	1.4.99.1	D-amino-acid dehydrogenase.	A D-amino acid + H(2)O + acceptor = a 2-oxo acid + NH(3) + reduced acceptor.	FAD.	Nitrogen metabolism	Energy Metabolism	METABOLIC
404	71963	1.4.99.1	D-amino-acid dehydrogenase.	A D-amino acid + H(2)O + acceptor = a 2-oxo acid + NH(3) + reduced acceptor.	FAD.	Phenylalanine metabolism	Amino Acid Metabolism	METABOLIC
405	34599	1.1.1.35	3-hydroxyacyl-CoA dehydrogenase.	(S)-3-hydroxyacyl-CoA + NAD(+) = 3-oxoacyl-CoA + NADH.	--	Benzoate degradation via CoA ligation	Biodegradation of Xenobiotics	METABOLIC
405	34599	1.1.1.35	3-hydroxyacyl-CoA dehydrogenase.	(S)-3-hydroxyacyl-CoA + NAD(+) = 3-oxoacyl-CoA + NADH.	--	Butanoate metabolism	Carbohydrate Metabolism	METABOLIC
405	34599	1.1.1.35	3-hydroxyacyl-CoA dehydrogenase.	(S)-3-hydroxyacyl-CoA + NAD(+) = 3-oxoacyl-CoA + NADH.	--	Fatty acid biosynthesis (path 2)	Lipid Metabolism	METABOLIC
405	34599	1.1.1.35	3-hydroxyacyl-CoA dehydrogenase.	(S)-3-hydroxyacyl-CoA + NAD(+) = 3-oxoacyl-CoA + NADH.	--	Fatty acid metabolism	Lipid Metabolism	METABOLIC
405	34599	1.1.1.35	3-hydroxyacyl-CoA dehydrogenase.	(S)-3-hydroxyacyl-CoA + NAD(+) = 3-oxoacyl-CoA + NADH.	--	Lysine degradation	Amino Acid Metabolism	METABOLIC
405	34599	1.1.1.35	3-hydroxyacyl-CoA dehydrogenase.	(S)-3-hydroxyacyl-CoA + NAD(+) = 3-oxoacyl-CoA + NADH.	--	Tryptophan metabolism	Amino Acid Metabolism	METABOLIC
405	34599	1.1.1.35	3-hydroxyacyl-CoA dehydrogenase.	(S)-3-hydroxyacyl-CoA + NAD(+) = 3-oxoacyl-CoA + NADH.	--	Valine, leucine and isoleucine degradation	Amino Acid Metabolism	METABOLIC
