# Supplementary material for: Proteomic Analysis of Fusarium solani Isolated from the Asian Longhorned Beetle, Anoplophora glabripennis
Source: PLoS One. 2012 Apr 9;7(4):e32990. doi: 10.1371/journal.pone.0032990 (PMC3322136; doi:10.1371/journal.pone.0032990)
Supplement: Table S6 — Starvation and stress-related proteins from MudPIT analysis. (XLS) [file pone.0032990.s006.xls]

## Sheet: Table S6
Table S6: Starvation and stress-related proteins from MudPIT analysis
Starvation/Stress Related Proteins	Number of Proteins	Protein ID	Interpro ID (or description if known)	KEGG EC Number (if known)	Secreted?
Candidate amine oxidase	1	347	IPR000205 and KOG0029		Y
Candidate cyclohexanone monoxygenase	1	345	KOG 1399: Secondary metabolite biosynthesis/ metabolism: Flavin containing monoxygenase and cyclohexanone monoxygenase		N
Candidate cytochrome p450	1	270	Blast homology	1.14.-.-: Acting on paired donors, with incorporation or reduction of	Y
Candidate mucin glycoprotein	1	147	Mucin-like glyco repeat	3.2.1.3: Glucan 1,4-alpha-glucosidase	Y
Candidate triphenylmethane degrading protein	1	388	Blast homology		N
Candidate xenobiotic monoxygenease	1	200	Flavin-utilizing monoxygenase super family; nitrilotriacetate monogenase hit		N
Candidate wornin body protein	1	76	Blast homology		N
Cell wall spore protein	1	86	Blast homology		Y
Cupin/Germin protein	5	15, 103, 112, 262, 268	IPR000276, IPR001929, IPR006045, IPR007113		Y
Cytochrome p450	2	355, 369	IPR001128, IPR001411, IPR001431, IPR001687, IPR003439, IPR004584, IPR004638, IPR007114, IPR007863	3.4.24.64: Mitochondrial processing peptidase and 3.6.-.- acting on acid hydrides	N
Gamma glutamyl transpeptidase	1	100	IPR000101	2.3.2.2: Gamma glutamyl transpeptidase	N
Heat shock protein 20	2	167, 308	IPR002068		N
Heat shock protein 70	1	132	IPR000169, IPR001023		N
Patatin-containing protein	1	183	IPR000595		Y
Ribonuclease	2	48, 65	IPR000026, IPR001568	3.1.27.1: Ribonuclease A2	Y
RTA1 like protein	1	286	Blast homology		N
