# Supplementary material for: Proteomic Analysis of Fusarium solani Isolated from the Asian Longhorned Beetle, Anoplophora glabripennis
Source: PLoS One. 2012 Apr 9;7(4):e32990. doi: 10.1371/journal.pone.0032990 (PMC3322136; doi:10.1371/journal.pone.0032990)
Supplement: Table S7 — Proteins related to Host plant interaction from MudPIT analysis. (XLS) [file pone.0032990.s007.xls]

## Sheet: Table S7
Table S7: Host plant interaction proteins from MudPIT analysis
Host Interaction Proteins	Number of Proteins	Protein ID	Interpro ID (or description if known)	Secreted?
Aflatoxin biosynthesis regulatory protein	2	225, 356	IPR001138, IPR002409	N
Apple domain containing protein	1	177	IPR003014, IPR003609	Y
Candidate toxin	1	176	Blast homology to TOX1 from Fusarium virguliforme	Y
Cerato-platanin containing protein	2	28, 38	IPR010829	Y
Isochorismatase hydrolase	1	84	IPR000868	Y
Necrosis-inducing protein	1	105	IPR008701	Y
